# Supplementary material for: Molecular Evolution of RAMOSA1 (RA1) in Land Plants
Source: Preprints.org preprint supplement (doi:10.20944/preprints202404.0730.v1), 2024-04-10
Supplement: Supplementary file 1 [file supplementary]

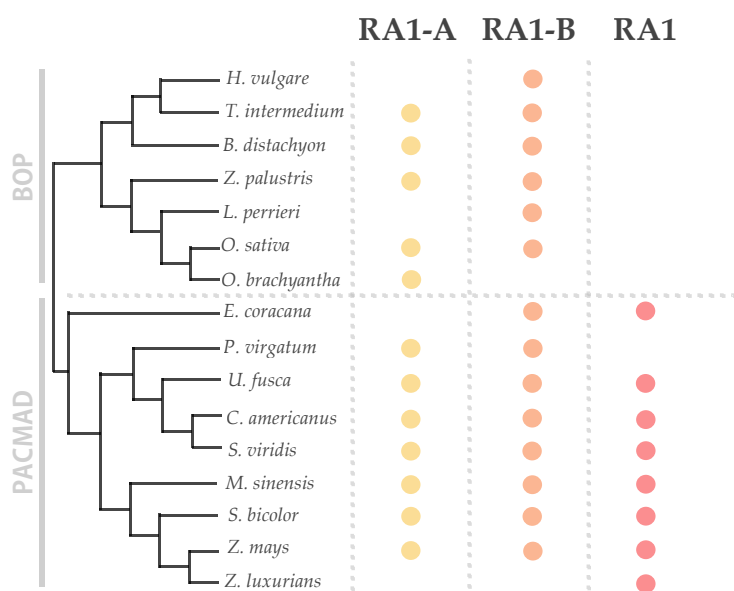

**Figure S4.** Scheme representing the presence or absence of RA1 and RA1-like proteins in grass species. Colored circle represents the presence of the protein.
