# Supplementary material for: Molecular Evolution of RAMOSA1 (RA1) in Land Plants
Source: Preprints.org preprint supplement (doi:10.20944/preprints202404.0730.v1), 2024-04-10
Supplement: Supplementary file 1 [file supplementary]

## Sheet: Graph-SS-Secuencias
		-190										-180										-170										-160										-150
											10										20										30										40
RA1-Zm00001d020430 PsiPred	1
SS
Pred Confidence
pCoil
pHelix
pBeta
DisoP31 ProtBind disord “^” Not PB disord “-” ordered “.”
DisoPred31 Binding Pred. numeric
DisoPred31 Binding Pred. numeric
DisoPred31 Disorder Pred. numeric
DisoPred31 Disorder Pred. numeric
RA1-Zm00001d020430 AFold
DSSP SS AFold
RA1_Zm00001d020430 DinMol sim-B
SS
SS stability
SUP_AT3G23130 PsiPred
SS
Pred Confidence
pCoil
pHelix
pBeta
DisoP31 ProtBind disord “^” Not PB disord “-” ordered “.”
DisoPred31 Binding Pred. numeric
DisoPred31 Binding Pred. numeric
DisoPred31 Disorder Pred. numeric
DisoPred31 Disorder Pred. numeric
SUP_AT3G23130 AFold
DSSP SS AFold
SUP_AT3G23130 DinMol sim-A
SS
SS stability
RA1-likeB_Zm00001d025051
SS
Pred Confidence
pCoil
pHelix
pBeta
DisoP31 ProtBind disord “^” Not PB disord “-” ordered “.”
DisoPred31 Binding Pred. numeric
DisoPred31 Binding Pred. numeric
DisoPred31 Disorder Pred. numeric
DisoPred31 Disorder Pred. numeric
RA1-likeB_Zm00001d025051 AFold
DSSP SS AFold
RA1-likeA_Zm00001d014917 PsiPred
SS
Pred Confidence
pCoil
pHelix
pBeta
DisoP31 ProtBind disord “^” Not PB disord “-” ordered “.”
DisoPred31 Binding Pred. numeric
DisoPred31 Binding Pred. numeric
DisoPred31 Disorder Pred. numeric
DisoPred31 Disorder Pred. numeric
RA1-likeA_Zm00001d014917 AFold
DSSP SS AFold
LOCOs02g01090 PsiPred
SS
Pred Confidence
pCoil
pHelix
pBeta
DisoP31 ProtBind disord “^” Not PB disord “-” ordered “.”
DisoPred31 Binding Pred. numeric
DisoPred31 Binding Pred. numeric
DisoPred31 Disorder Pred. numeric
DisoPred31 Disorder Pred. numeric
LOCOs02g01090 AFold
DSSP SS AFold
		1	2	3	4	5	6	7	8	9	10	11	12	13	14	15	16	17	18	19	20	21	22	23	24	25	26	27	28	29	30	31	32	33	34	35	36	37	38	39	40	41	42	43	44	45	46	47	48
LOCOs04g08600 PsiPred		M	A	F	R	Q	W	I	G	E	V	G	W	W	T	G	C	T	W	R	G	A	A	K	P	E	A	A	S	A	R	C	G	S	D	Y	T	S	G	N	D	W	P	E	F	C	G	K	W
SS		C	C	H	H	H	H	H	H	H	C	H	H	H	C	C	C	E	E	C	C	C	C	C	C	H	H	H	H	H	H	C	C	C	C	C	C	C	C	C	C	C	C	C	C	C	C	E	E
Pred Confidence		9	3	2	6	5	7	7	6	5	1	5	5	1	1	6	3	1	3	3	5	4	4	5	5	4	3	5	6	3	2	5	9	9	9	8	8	7	7	7	6	6	4	3	1	6	5	0	3
pCoil		0.999	0.674	0.328	0.16	0.182	0.119	0.103	0.178	0.187	0.542	0.207	0.214	0.332	0.491	0.766	0.673	0.365	0.283	0.615	0.677	0.667	0.694	0.769	0.699	0.211	0.202	0.16	0.124	0.258	0.318	0.725	0.936	0.982	0.97	0.93	0.916	0.88	0.873	0.847	0.81	0.786	0.656	0.556	0.45	0.755	0.738	0.444	0.254
pHelix		0	0.332	0.606	0.799	0.721	0.821	0.877	0.79	0.778	0.427	0.733	0.738	0.518	0.353	0.096	0.113	0.058	0.078	0.162	0.139	0.103	0.076	0.037	0.185	0.632	0.633	0.757	0.81	0.638	0.533	0.15	0.03	0.007	0.016	0.057	0.072	0.121	0.122	0.128	0.138	0.1	0.225	0.239	0.301	0.12	0.079	0.119	0.207
pBeta		0.001	0.037	0.019	0.046	0.061	0.037	0.027	0.035	0.04	0.027	0.031	0.074	0.222	0.172	0.118	0.274	0.56	0.641	0.283	0.154	0.26	0.246	0.188	0.15	0.106	0.262	0.08	0.082	0.196	0.142	0.067	0.035	0.012	0.013	0.016	0.016	0.019	0.025	0.037	0.05	0.103	0.182	0.243	0.292	0.113	0.231	0.451	0.621
DisoP31 ProtBind disord “^” Not PB disord “-” ordered “.”		-	.	.	.	.	.	.	.	.	.	.	.	.	.	.	.	.	.	.	.	.	.	.	.	.	.	.	.	.	.	.	.	.	.	.	.	.	.	.	.	.	.	.	.	.	.	.	.
DisoPred31 Binding Pred. numeric		0.33	NA	NA	NA	NA	NA	NA	NA	NA	NA	NA	NA	NA	NA	NA	NA	NA	NA	NA	NA	NA	NA	NA	NA	NA	NA	NA	NA	NA	NA	NA	NA	NA	NA	NA	NA	NA	NA	NA	NA	NA	NA	NA	NA	NA	NA	NA	NA
DisoPred31 Binding Pred. numeric		||||||||
DisoPred31 Disorder Pred. numeric		0.6	0.32	0.25	0.21	0.16	0.12	0.08	0.09	0.05	0.04	0.04	0.03	0.03	0.05	0.06	0.07	0.1	0.12	0.15	0.18	0.21	0.19	0.17	0.23	0.24	0.24	0.23	0.3	0.26	0.23	0.21	0.19	0.18	0.15	0.16	0.16	0.16	0.15	0.12	0.1	0.08	0.08	0.08	0.08	0.08	0.08	0.08	0.09
DisoPred31 Disorder Pred. numeric		|||||||||||||||	||||||||	||||||	|||||	||||	|||	||	||	|	|	|			|	|	|	||	|||	|||	||||	|||||	||||	||||	|||||	||||||	||||||	|||||	|||||||	||||||	|||||	|||||	||||	||||	|||	||||	||||	||||	|||	|||	||	||	||	||	||	||	||	||	||
LOCOs04g08600 AFold		M	A	F	R	Q	W	I	G	E	V	G	W	W	T	G	C	T	W	R	G	A	A	K	P	E	A	A	S	A	R	C	G	S	D	Y	T	S	G	N	D	W	P	E	F	C	G	K	W
DSSP SS AFold		C	C	S	H	H	H	H	H	H	H	T	T	T	T	T	C	C	C	C	C	C	C	C	C	C	C	C	C	C	C	C	C	C	C	C	C	C	C	C	C	C	C	C	C	C	C	C	C
Sevir_1G000700 PsiPred
SS
Pred Confidence
pCoil
pHelix
pBeta
DisoP31 ProtBind disord “^” Not PB disord “-” ordered “.”
DisoPred31 Binding Pred. numeric
DisoPred31 Binding Pred. numeric
DisoPred31 Disorder Pred. numeric
DisoPred31 Disorder Pred. numeric
Sevir_1G000700 AFold
DSSP SS AFold
Sevir_2G209800 PsiPred
SS
Pred Confidence
pCoil
pHelix
pBeta
DisoP31 ProtBind disord “^” Not PB disord “-” ordered “.”
DisoPred31 Binding Pred. numeric
DisoPred31 Binding Pred. numeric
DisoPred31 Disorder Pred. numeric
DisoPred31 Disorder Pred. numeric
Sevir_2G209800 AFold
DSSP SS AFold
Sevir_7G004800 PsiPred
SS
Pred Confidence
pCoil
pHelix
pBeta
DisoP31 ProtBind disord “^” Not PB disord “-” ordered “.”
DisoPred31 Binding Pred. numeric
DisoPred31 Binding Pred. numeric
DisoPred31 Disorder Pred. numeric
DisoPred31 Disorder Pred. numeric
Sevir_7G004800 AFold
DSSP SS AFold
PpSUP-LOC112284422 PsiPred
SS
Pred Confidence
pCoil
pHelix
pBeta
DisoP31 ProtBind disord “^” Not PB disord “-” ordered “.”
DisoPred31 Binding Pred. numeric
DisoPred31 Binding Pred. numeric
DisoPred31 Disorder Pred. numeric
DisoPred31 Disorder Pred. numeric
PpSUP-LOC112284422 AFold
DSSP SS AFold
TpSUP-Thupl-29380027s0001 PsiPred
SS
Pred Confidence
pCoil
pHelix
pBeta
DisoP31 ProtBind disord “^” Not PB disord “-” ordered “.”
DisoPred31 Binding Pred. numeric
DisoPred31 Binding Pred. numeric
DisoPred31 Disorder Pred. numeric
DisoPred31 Disorder Pred. numeric
TpSUP-Thupl-29380027s0001 AFold
DSSP SS AFold
AmTrSUP-LOC110007429 PsiPred
SS
Pred Confidence
pCoil
pHelix
pBeta
DisoP31 ProtBind disord “^” Not PB disord “-” ordered “.”
DisoPred31 Binding Pred. numeric
DisoPred31 Binding Pred. numeric
DisoPred31 Disorder Pred. numeric
DisoPred31 Disorder Pred. numeric
AmTrSUP-LOC110007429 AFold
DSSP SS AFold
AqCoSUP-Aqcoe2G368300 PsiPred
SS
Pred Confidence
pCoil
pHelix
pBeta
DisoP31 ProtBind disord “^” Not PB disord “-” ordered “.”
DisoPred31 Binding Pred. numeric
DisoPred31 Binding Pred. numeric
DisoPred31 Disorder Pred. numeric
DisoPred31 Disorder Pred. numeric
AqCoSUP-Aqcoe2G368300 AFold
DSSP SS AFold
MtSUP-Medtr2g076060 PsiPred
SS
Pred Confidence
pCoil
pHelix
pBeta
DisoP31 ProtBind disord “^” Not PB disord “-” ordered “.”
DisoPred31 Binding Pred. numeric
DisoPred31 Binding Pred. numeric
DisoPred31 Disorder Pred. numeric
DisoPred31 Disorder Pred. numeric
MtSUP-Medtr2g076060 AFold
DSSP SS AFold
DaSUP-Dioal-1064s0003 PsiPred
SS
Pred Confidence
pCoil
pHelix
pBeta
DisoP31 ProtBind disord “^” Not PB disord “-” ordered “.”
DisoPred31 Binding Pred. numeric
DisoPred31 Binding Pred. numeric
DisoPred31 Disorder Pred. numeric
DisoPred31 Disorder Pred. numeric
DaSUP-Dioal-1064s0003 AFold
DSSP SS AFold
JaSUP-Joasc-05G015500 PsiPred
SS
Pred Confidence
pCoil
pHelix
pBeta
DisoP31 ProtBind disord “^” Not PB disord “-” ordered “.”
DisoPred31 Binding Pred. numeric
DisoPred31 Binding Pred. numeric
DisoPred31 Disorder Pred. numeric
DisoPred31 Disorder Pred. numeric
JaSUP-Joasc-05G015500 AFold
DSSP SS AFold
PlSUP-Phala-02G002500 PsiPred
SS
Pred Confidence
pCoil
pHelix
pBeta
DisoP31 ProtBind disord “^” Not PB disord “-” ordered “.”
DisoPred31 Binding Pred. numeric
DisoPred31 Binding Pred. numeric
DisoPred31 Disorder Pred. numeric
DisoPred31 Disorder Pred. numeric
PlSUP-Phala-02G002500 AFold
DSSP SS AFold
GAGA-DNA (animal)
[truncated: 257 more columns]

## Sheet: Referencias
			Helix (high probab.)			B-sheet (high probab.)				Disordered
			Helix (less probab.)			B-sheet (less probab.)				Disordered Binding Protein
			Helix 3_10			B-bridge				Disordered not Protein Binding
			Turn			Bend				Zn-finger motif
			Helix (high probab.) binding Prot			Knock-out residues				Ear motif
			Helix (low probab.) binding Prot			Putative determinants DNA recognition				Bias polar residues
