# Supplementary material for: Molecular Evolution of RAMOSA1 (RA1) in Land Plants
Source: Preprints.org preprint supplement (doi:10.20944/preprints202404.0730.v1), 2024-04-10
Supplement: Supplementary file 2 [file Table S1.xlsx]

## Sheet: Sheet 1
Protein data information from embryophyte genomes
Name	Specie	Accession number	Gene synonym	Gene ID	Database
AmTrSUP	Amborella trichopoda	XP_020524107	LOC110007429	110007429	NCBI
AcSUP	Anana comosus	CAD1843868		Aco026992	NCBI
AqCoSUP	Aquilegia coerulea	PIA36490		Aqcoe2G368300	NCBI
SUP	Arabidopsis thaliana	NP_188954	AT3G23130	821888	NCBI
BsRA1-B	Brachypodium sylvaticum			Brasy9G007400	Phytozome
BrStRA1-A	Brachypodium stacei			Brast03G065800	Phytozome
BdRA1-A	Brachypodium distachyon	XP_010236493	LOC100825007	100825007	NCBI
BdRA1-B	Brachypodium distachyon	KQJ81432	Bradi5g00676.v2.1	Bradi5g00676	NCBI
BrSUP	Brassica rapa	RID79977		Brara.A02676	NCBI
CpSUP	Carica papaya	XP_021899488	LOC110815839	110815839	NCBI
CrSUP	Capsella rubella	XP_006299869	LOC17891762	17891762	NCBI
CaRA1	Cenchrus americanus	JAINUN010000007			NCBI
CaRA1-A	Cenchrus americanus	JAJHQD010000002			NCBI
CaRA1-B	Cenchrus americanus	JAINUN010000005			NCBI
CePuSUP	Ceratodon purpureus	KAG0590654		CepurGG1.1G096300	NCBI
CcSUP	Citrus clementina	XP_006420140	LOC18033414	18033414	NCBI
DaSUP	Dioscorea alata	KAH7690521		Dioal.1064s0003	NCBI
EcRA1	Eleusine coracana	GJN34039	gb22674	ELECO.r07.6AG0534810	NCBI
EcRA1-B	Eleusine coracana	GJN12084	ga30329	ELECO.r07.4AG0326580	NCBI
HvRA1-B	Hordeum vulgare	XP_044962983	LOC123418709	123418709	NCBI
JaSUP	Joinvillea ascendens			Joasc.05G015500	Phytozome
LpRA1-B	Leersia perrieri			LPERR04G01660	Gramene
MtSUP	Medicago truncatula	ABD32946	AC151598_14.2	Medtr2g076060	NCBI
MsRA1	Miscanthus sinensis	AAY17042			NCBI
MsRA1-A	Miscanthus sinensis			Misin07G001200	Phytozome
MsRA1-B	Miscanthus sinensis			Misin12G022700	Phytozome
OeSUP	Olea europaea	CAA2999943		Oeu002594.1	NCBI
OrBaRA1-A	Oryza barthii			OBART02G00100	Gramene
OrBaRA1-B	Oryza barthii			OBART04G02370	Gramene
ObRA1-A	Oryza brachyantha	XM_006648133	LOC102718339	102718339	NCBI
OgRA1-A	Oryza glaberrima			ORGLA02G0000400	Gramene
OrGlRA1-A	Oryza glumipatula			OGLUM02G00100	Gramene
OrGlRA1-B	Oryza glumipatula			OGLUM04G02100	Gramene
OmRA1-A	Oryza meridionalis			OMERI02G00080	Gramene
OmRA1-B	Oryza meridionalis			OMERI04G02610	Gramene
OnRA1-A	Oryza nivara			ONIVA02G00110	Gramene
OpRA1-A	Oryza punctata			OPUNC11G05640	Gramene
OpRA1-B	Oryza punctata			OPUNC04G02400	Gramene
OrRA1-A	Oryza rufipogon			ORUFI02G00090	Gramene
OrRA1-B	Oryza rufipogon			ORUFI04G03150	Gramene
OsRA1-A	Oryza sativa	XP_015624301	LOC107275345	107275345	NCBI
OsRA1-B	Oryza sativa	CAE03847	OSJNBb0089K06.6	LOC_Os04g08600	NCBI
PhRA1	Panicum hallii	PVH64401		Pahal.B02742	NCBI
PhRA1-A	Panicum hallii	PVH65472		Pahal.J00486	NCBI
PhRA1-B	Panicum hallii	XP_025826453	LOC112901704	112901704	NCBI
PvRA1-A	Panicum virgatum	XP_039787499	LOC120653886	120653886	NCBI
PvRA1-B	Panicum virgatum	XP_039775429	LOC120642912	120642912	NCBI
PlSUP	Pharus latifolius			Phala.02G002500	Phytozome
PpSUP	Physcomitrella patens	XP_024379966	LOC112284422	112284422	NCBI
PtSUP	Populus trichocarpa	XP_002311666	LOC7467531	7467531	NCBI
PrPeSUP	Prunus persica	XP_007226157	LOC18790670	18790670	NCBI
RcSUP	Ricinus communis	XP_002529318	LOC8276170	8276170	NCBI
SvRA1	Setaria viridis	XP_034583085	LOC117846092	117846092	NCBI
SvRA1-A	Setaria viridis	XP_034583844	LOC117846851	117846851	NCBI
SvRA1-B	Setaria viridis	TKW03159		Sevir.7G004800	NCBI
SbRA1a	Sorghum bicolor	KAG0543662	Sb02g024410	Sobic.002G197800	NCBI
SbRA1b	Sorghum bicolor	XP_021309209	LOC8055805	8055805	NCBI
SbRA1-A	Sorghum bicolor	EES06090	Sb04g000270	Sobic.004G000800	NCBI
SbRA1-B	Sorghum bicolor	KAG0525026	Sb06g001730	Sobic.006G018600	NCBI
StSUP	Solanum tuberosum	XP_006354554	LOC102585844	102585844	NCBI
TcSUP	Theobroma cacao	EOY05961	AT3G23130.1	Thecc1EG020818	NCBI
TiRA1-A	Thinopyrum intemedium			Thint.21G0294100	Phytozome
TiRA1-B	Thinopyrum intemedium			Thint.05G0311900	Phytozome
TpSUP	Thuja plicata			Thupl.29380027s0001	Phytozome
UfRA1	Urochloa fusca			Urofu.2G205300	Phytozome
UfRA1-A	Urochloa fusca			Urofu.1G000600	Phytozome
UfRA1-B	Urochloa fusca			Urofu.7G028100	Phytozome
VdSUP	Vaccinium darrowii	KAH7842335		Vadar_g31690	NCBI
ZlRA1	Zea luxurians	ACX94189			NCBI
RA1	Zea mays	NP_001143449	GRMZM2G003927	100276104	NCBI
ZmRA1-A	Zea mays	XP_008646713	LOC103628259	103628259	NCBI
ZmRA1-B	Zea mays	AQK42861	GRMZM2G137736	Zm00001d025051	NCBI
ZpRA1-A	Zizania palustris	KAG8076398			NCBI
ZpRA1-B	Zizania palustris	KAG8064100			NCBI
