# Supplementary material for: Molecular Evolution of RAMOSA1 (RA1) in Land Plants
Source: Preprints.org preprint supplement (doi:10.20944/preprints202404.0730.v1), 2024-04-10
Supplement: Supplementary file 3 [file supplementary]

(a)

Arabidopsis thaliana TAIR10    Zea mays RefGen\_V4

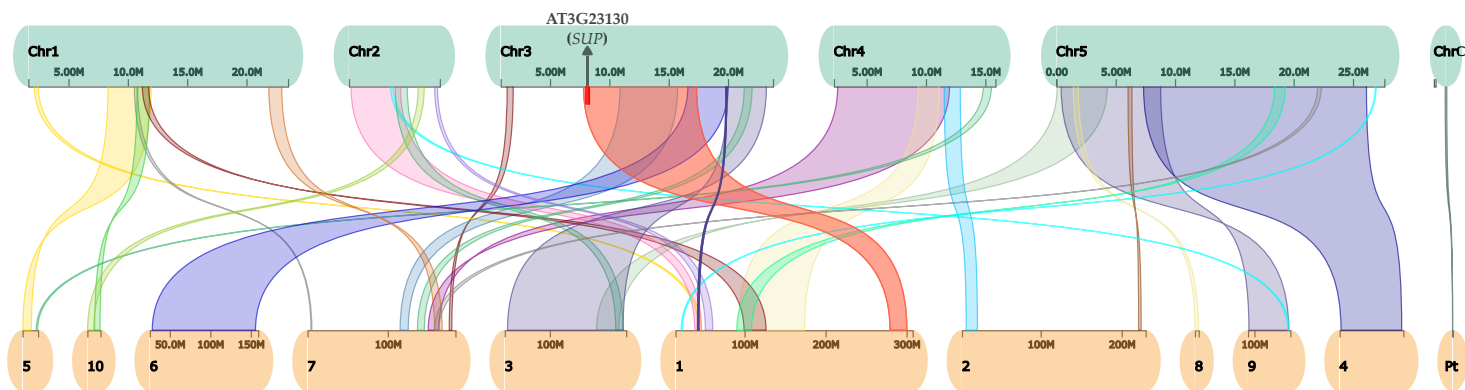

(b)

Arabidopsis thaliana TAIR10    Zea mays RefGen\_V4

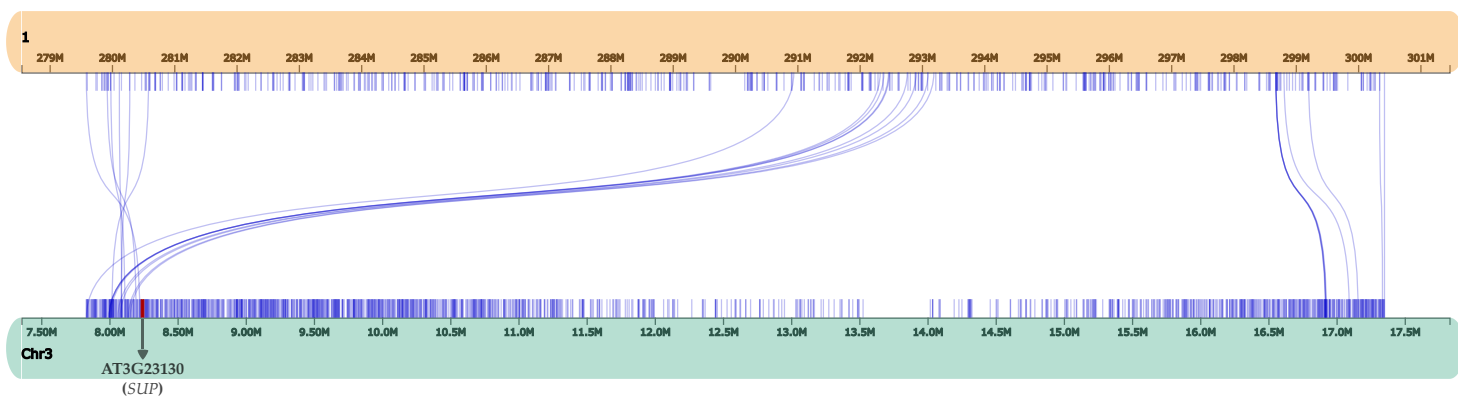

**Figure S5.** Chromosome synteny between *A. thaliana* and *Z. mays*. (a) Analysis of synteny between genomes. The colored lines link collinearity blocks that represent syntenic regions identified by GENESPACE. (b) Gene alignment between chromosome 3 of *A. thaliana* and chromosome 1 of *Z. mays*.
