# Supplementary material for: Molecular Evolution of RAMOSA1 (RA1) in Land Plants
Source: Preprints.org preprint supplement (doi:10.20944/preprints202404.0730.v1), 2024-04-10
Supplement: Supplementary file 4 [file supplementary]

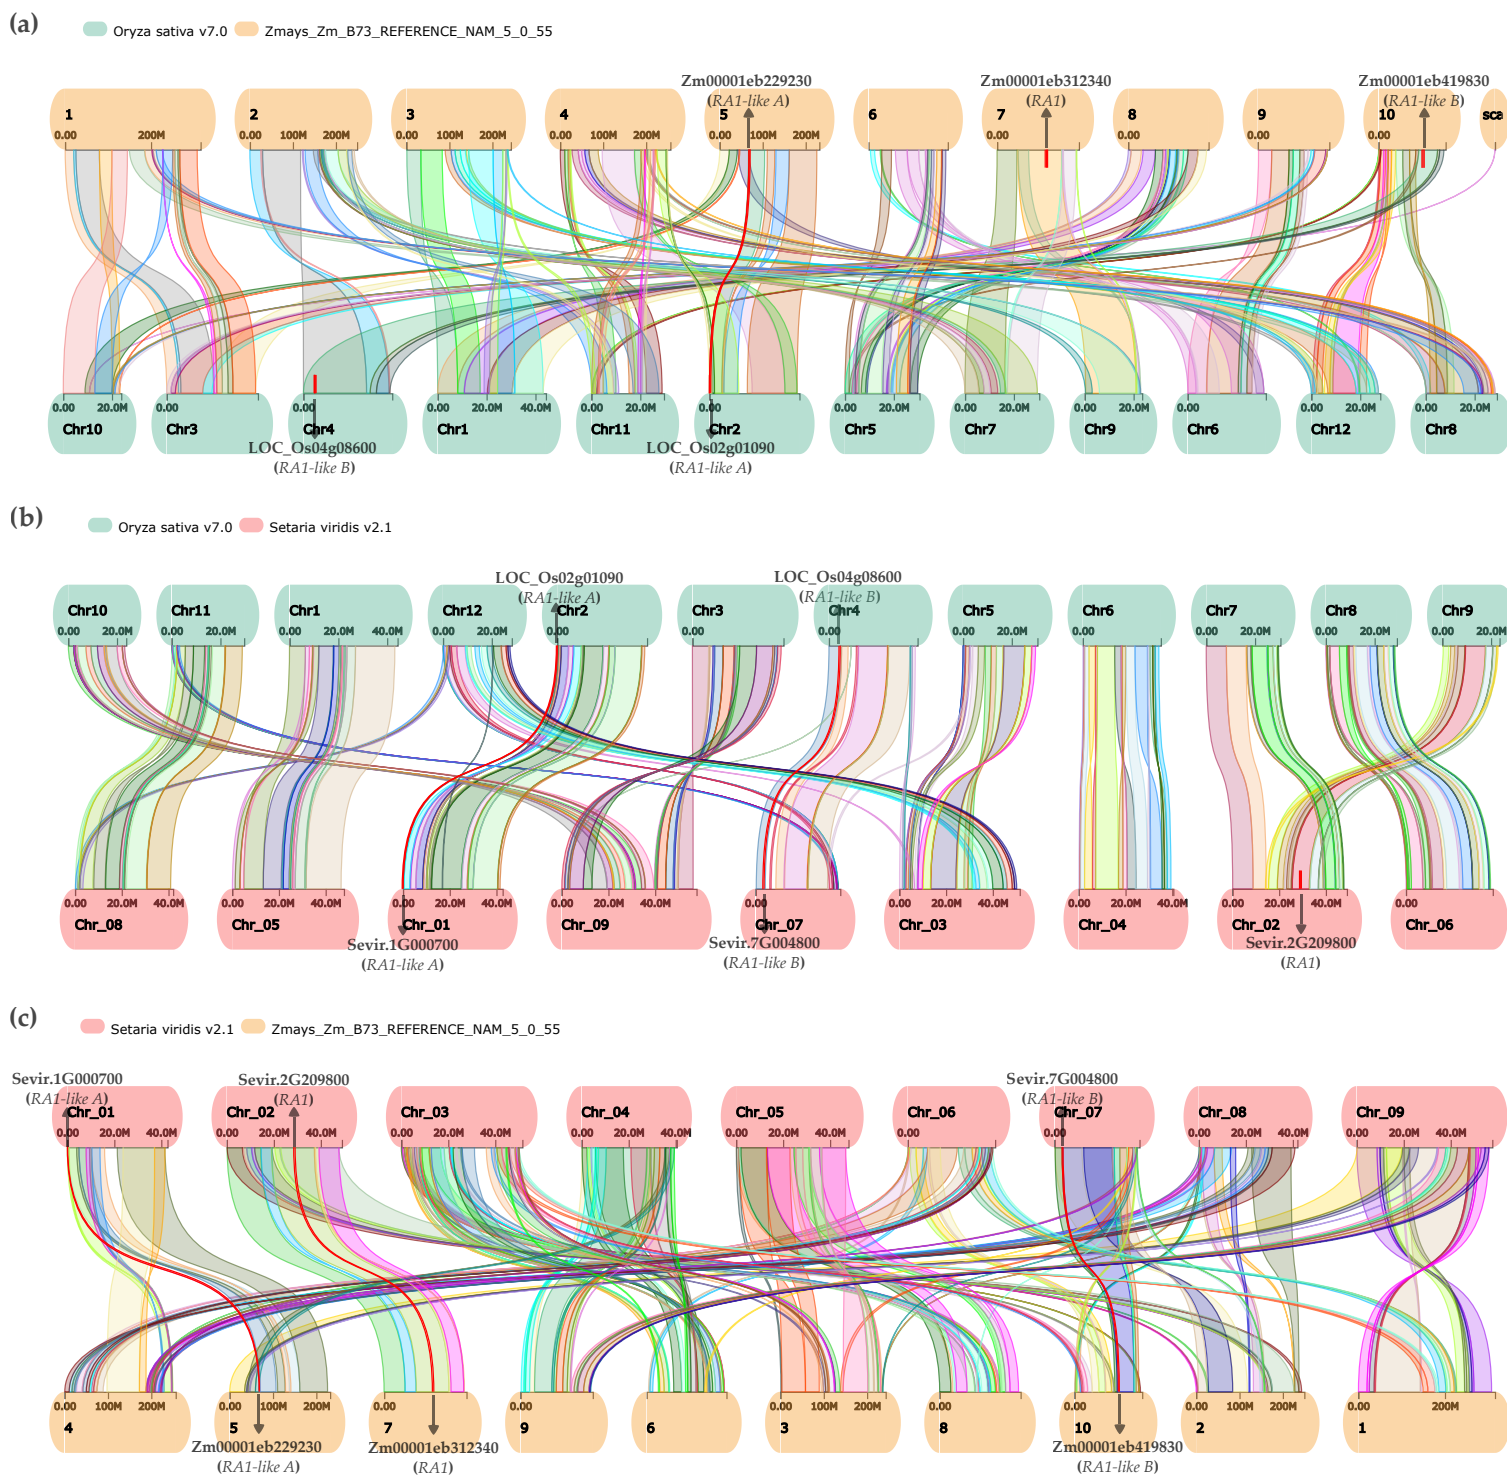

**Figure S6.** Chromosome synteny between *O. sativa*, *Z. mays*, and *S. viridis*. (a) Analysis of synteny between *O. sativa* and *Z. mays* genomes. The colored lines link collinearity blocks that represent syntenic regions identified by GENESPACE. (b) Analysis of synteny between *O. sativa* and *S. viridis* genomes. The colored lines link collinearity blocks that represent syntenic regions identified by GENESPACE. (c) Analysis of synteny between *S. viridis* and *Z. mays* genomes. The colored lines link collinearity blocks that represent syntenic regions identified by GENESPACE.
