# Supplementary material for: Molecular Evolution of RAMOSA1 (RA1) in Land Plants
Source: Preprints.org preprint supplement (doi:10.20944/preprints202404.0730.v1), 2024-04-10
Supplement: Supplementary file 4 [file Table S3.xlsx]

## Sheet: Sheet 1
Primers and enzymes used in each genetic construction
Oligonucleotide	Enzyme	Sequence (5’-3’)
ZmRA1 F	EcoRI	CCGGAATTCATGGAGGGAGAAGATGACGG
ZmRA1 R	XhoI	GGCCTCGAGTCAGTAGTAGCCCAGTCTA
SvRA1 F	BamHI	CGGGGATCCATGGAGAGAGATGATGGCTAC
SvRA1 R	EcoRI	CGGGAATTCTCAGGAGTGGCCAAGTCTTA
SvRA1-A F	BamHI	CGGGGATCCATGGAGAGGGAGAGCAAGC
SvRA1-A R	EcoRI	CGGGAATTCTCAAGAAGAAGAGACGCCGA
SvRA1-B F	EcoRI	CGGGAATTCATGGAGGGCAGAGACCAC
SvRA1-B R	NotI	CGGGCGGCCGCTCACTCCCAGGCACATCC
