# Supplementary material for: Molecular Evolution of RAMOSA1 (RA1) in Land Plants
Source: Preprints.org preprint supplement (doi:10.20944/preprints202404.0730.v1), 2024-04-10
Supplement: Supplementary file 5 [file supplementary]

| Symbol                                                                           | Motif    | Logo                                                                              | Consensus sequence                                | Width (aa) | E-value   |
|----------------------------------------------------------------------------------|----------|-----------------------------------------------------------------------------------|---------------------------------------------------|------------|-----------|
|  | Motif 1  |  | SSSSSYTCGYCKREFRSQAQLGGHMNVHRRDRARLRHQSP          | 41         | 9.9e-1061 |
|  | Motif 2  |  | GDGAEEGLDLELRIG                                   | 15         | 1.2e-282  |
|  | Motif 3  |  | ARAPJPNLNYSPHPA                                   | 16         | 1.5e-134  |
|  | Motif 4  |  | APPVVYSFFSLAASA                                   | 15         | 1.3e-080  |
|  | Motif 5  |  | MERESDKQQQQ                                       | 11         | 6.2e-032  |
|  | Motif 6  |  | IHLPNILATVAKQCALEKQEQIETSHANYTGHHSTTPAGHPPTMEGRDH | 50         | 2.7e021   |
|  | Motif 7  |  | WPPQVRS                                           | 8          | 2.3e-014  |
|  | Motif 8  |  | PPNPNPSCVTLDL                                     | 14         | 1.5e-009  |
|  | Motif 9  |  | WYYSCSF                                           | 7          | 3.2e-005  |
|  | Motif 10 |  | LKPLQPWTTTT                                       | 11         | 1.3e-004  |
|  | Motif 11 |  | FWPPQ                                             | 6          | 1.6e-004  |
|  | Motif 12 |  | VVCSCST                                           | 8          | 6.2e-003  |
|  | Motif 13 |  | MESRSAARAGDQQH                                    | 14         | 9.6e-004  |
|  | Motif 14 |  | MAVTKGLEVDLELEV                                   | 15         | 4.6e-001  |
|  | Motif 15 |  | AASDGGGLAVP                                       | 10         | 6.4e+000  |

**Figure S8.** Motif consensus sequences identified by MEME. The 35 amino acid C2H2 sequences from 16 grass species were used to identify conserved motifs among them. Fifteen motifs were identified. Motif 1 represents the conserved zinc finger domain. Motif 2 represents the conserved EAR motif.
