# Supplementary material for: Molecular Evolution of RAMOSA1 (RA1) in Land Plants
Source: Preprints.org preprint supplement (doi:10.20944/preprints202404.0730.v1), 2024-04-10
Supplement: Supplementary file 6 [file Table S5.xlsx]

## Sheet: Sheet 1
RA1 Andropogoneae
ALT_ID	CONSENSUS	WIDTH	SITES	EVALUE	SIM_MOTIF	Tomtom
MEME-4	SWYACRCGCGCCACTCGACTAGCTAGC	27	5	1.30e-017	SWYACRCGCGCCACTCGACTAGCTAGC	MA1426.1 (MYB124)
MEME-5	CRGCTCCCTCCATTTGTCCATTCBCCAAAG	30	5	3.10e-017	CRGCTCCCTCCATTTGTCCATTCBCCAAAG	MA0586.2 (SPL14)
MEME-7	CTAGCYCAGCTTTRGTTTATAGCACTCTCT	30	5	1.50e-014	MA0053.1 (MNB1A)
MEME-8	GYGCAGCCTTTTGTTTTGCCGCCCVKVC	28	5	2.40e-012	GYGCAGCCTTTTGTTTTGCCGCCCVKVC	MA0979.1 (ERF008)
MEME-13	TRTGTGTGTATATATATAYAT	21	5	6.40e-003	TRTGTGTGTATATATATAYAT	MA0001.2 (AGL3)
MEME-14	AMAADAAAWGRWWTWTAAAAGTTGRGADTA	30	5	3.40e-002	MA1268.1 (CDF5)
MEME-1	GCGGGGAGAGCGCGGGGCCCGGCCGAGGAC	30	4	3.00e-021	MA1430.1 (TB1)
MEME-2	GGATCACGTCTGTGTGTCGCTTTCGCAGCA	30	4	2.20e-018	GGATCACGTCTGTGTGTCGCTTTCGCAGCA	MA2013.1 (ERF115)
MEME-3	GTGTGCCGGGCCATCTGCGCKTCGTGTGAC	30	4	9.00e-018	MA1417.1 (O2)
MEME-6	GCATGGACCGATGGACGCATGCAGACCATT	30	4	1.10e-015	MA0564.1 (ABI3)
MEME-9	GCTBGCAGCCTACATCTGCAAAYTCACAA	29	4	1.60e-010	MA0978.1 (DREB1E)
MEME-10	CGGAGGMRWCAGCAGGTCGRGTTCAATGGA	30	4	2.20e-010	CGGAGGMRWCAGCAGGTCGRGTTCAATGGA	MA1693.1 (ARF34)
MEME-11	GCATGGGTGCAGGTYCTGTAGCTATSCVCG	30	4	1.50e-007	GCATGGGTGCAGGTYCTGTAGCTATSCVCG	MA1810.1 (GLYMA-08G357600)
MEME-12	ATCTCACTATCTCADYGTGGTCAAAGTTG	29	4	1.00e-006	MA1091.1 (WRKY62)
# XSTREME (Motif Discovery and Enrichment Analysis): Version 5.5.3 released on Sat Jun 10 16:19:38 2023 -0700
# The format of this file is described at https://meme-suite.org/meme/doc/xstreme-output-format.html
# xstreme --oc . --time 240 --streme-totallength 4000000 --meme-searchsize 100000 --dna --evt 0.05 --minw 6 --maxw 30 --parse-genomic-coord --align center --streme-evt 0.05 --meme-evt 0.05 --meme-mod zoops --sea-noseqs --m db/motif_databases/JASPAR/JASPAR2022_CORE_plants_non-redundant_v2.meme --p Promotores_RA1_Andro.txt

## Sheet: Sheet 2
RA1 Paniceae
ALT_ID	CONSENSUS	WIDTH	SITES	EVALUE	SIM_MOTIF
MEME-1	CCTCGTACTGTYACTATTTDGBTTTCAG	28	4	7.70e-003	MA0553.1 (SMZ)
# XSTREME (Motif Discovery and Enrichment Analysis): Version 5.5.3 released on Sat Jun 10 16:19:38 2023 -0700
# The format of this file is described at https://meme-suite.org/meme/doc/xstreme-output-format.html
# xstreme --oc . --time 240 --streme-totallength 4000000 --meme-searchsize 100000 --dna --evt 0.05 --minw 6 --maxw 30 --parse-genomic-coord --align center --streme-evt 0.05 --meme-evt 0.05 --meme-mod zoops --sea-noseqs --m db/motif_databases/JASPAR/JASPAR2022_CORE_plants_non-redundant_v2.meme --p Promotores_RA1_no_Andro.txt

## Sheet: Sheet 3
RA1-like A Andropogoneae
ALT_ID	CONSENSUS	WIDTH	SITES	EVALUE	SIM_MOTIF
MEME-1	GTGGTCAAAGAGGASGACGGACTGGTCRST	30	3	1.10e-004	MA1091.1 (WRKY62)
MEME-2	CYRGCCCGGCSSGGACTCYCTCKCWCWCTC	30	3	5.90e-003	MA1416.1 (RAMOSA1)
# XSTREME (Motif Discovery and Enrichment Analysis): Version 5.5.3 released on Sat Jun 10 16:19:38 2023 -0700
# The format of this file is described at https://meme-suite.org/meme/doc/xstreme-output-format.html
# xstreme --oc . --time 240 --streme-totallength 4000000 --meme-searchsize 100000 --dna --evt 0.05 --minw 6 --maxw 30 --parse-genomic-coord --align center --streme-evt 0.05 --meme-evt 0.05 --meme-mod zoops --sea-noseqs --m db/motif_databases/JASPAR/JASPAR2022_CORE_plants_non-redundant_v2.meme --p Promotores_RA1-A_Andro.txt

## Sheet: Sheet 4
RA1-A Paniceae
ALT_ID	CONSENSUS	WIDTH	SITES	EVALUE	SIM_MOTIF	Tomtom
MEME-1	CTGCCCTCAHAGAATCTTGGCTGTGCCATC	30	4	2.30e-012	MA1386.2 (HHO3)
MEME-2	TCTACAGTGCCGTCGTCTGCTCGATCCCGG	30	4	9.30e-011	TCTACAGTGCCGTCGTCTGCTCGATCCCGG	MA1348.1 (TGA9)
MEME-3	CDCACCTTTGACAAACGAGACACGAGC	27	4	5.40e-008	CDCACCTTTGACAAACGAGACACGAGC	MA1756.1 (GRF9)
MEME-4	TGGGTGCATGGTTGTCCCATACCTCCABVG	30	4	2.80e-006	MA1096.1 (TCP5)
MEME-5	GVTCCTATACGTCAATCAGGAATTBCCG	28	4	3.70e-005	MA0129.1 (TGA1A)
MEME-6	TGCAACTGCTRVATGAATGAATGCATG	27	4	2.80e-004	MA1810.1 (GLYMA-08G357600)
MEME-7	AGAGAGAGRGAGAGAGAGABCGHCCAG	27	4	1.70e-002	MA1402.1 (BPC6)
MEME-8	TGGCTSCYGGACGTCACGTCGGCCGVCC	28	4	2.90e-002	MA0978.1 (DREB1E)
# XSTREME (Motif Discovery and Enrichment Analysis): Version 5.5.3 released on Sat Jun 10 16:19:38 2023 -0700
# The format of this file is described at https://meme-suite.org/meme/doc/xstreme-output-format.html
# xstreme --oc . --time 240 --streme-totallength 4000000 --meme-searchsize 100000 --dna --evt 0.05 --minw 6 --maxw 30 --parse-genomic-coord --align center --streme-evt 0.05 --meme-evt 0.05 --meme-mod zoops --sea-noseqs --m db/motif_databases/JASPAR/JASPAR2022_CORE_plants_non-redundant_v2.meme --p Promotores_RA1-A_no_Andro.txt

## Sheet: Sheet 5
RA1-like A BOP
ALT_ID	CONSENSUS	WIDTH	SITES	EVALUE	SIM_MOTIF
MEME-2	AAGTGCRTGCATGCATGR	18	5	3.20e-003	MA1810.1 (GLYMA-08G357600)
MEME-1	GAGAKCTAGAGAGAGAGAGAGAGA	24	4	2.20e-004	MA1403.1 (BPC5)
# XSTREME (Motif Discovery and Enrichment Analysis): Version 5.5.3 released on Sat Jun 10 16:19:38 2023 -0700
# The format of this file is described at https://meme-suite.org/meme/doc/xstreme-output-format.html
# xstreme --oc . --time 240 --streme-totallength 4000000 --meme-searchsize 100000 --dna --evt 0.05 --minw 6 --maxw 30 --parse-genomic-coord --align center --streme-evt 0.05 --meme-evt 0.05 --meme-mod zoops --sea-noseqs --m db/motif_databases/JASPAR/JASPAR2022_CORE_non-redundant_v2.meme --p Promotores_RA1-A_BOP.txt

## Sheet: Sheet 6
RA1-like B Andropogoneae
ALT_ID	CONSENSUS	WIDTH	SITES	EVALUE	SIM_MOTIF	Tomtom
MEME-1	GGACGCTTTMAGTGCCTCGGTAACACGCCC	30	3	5.40e-006	GGACGCTTTMAGTGCCTCGGTAACACGCCC	MA1044.1 (NAC92)
MEME-2	GGAGYTGGAGTGAGGCAGAAGCAAAARCCC	30	3	1.10e-004	GGAGYTGGAGTGAGGCAGAAGCAAAARCCC	MA1764.1 (MYB116)
MEME-3	CCCAGAATGGCTGSCMTTGTTCTGACGGTA	30	3	1.40e-004	CCCAGAATGGCTGSCMTTGTTCTGACGGTA	MA1688.1 (ARF16)
MEME-4	CAGGTGTCTTGTCGTGRAGAAAGGYACCTG	30	3	2.40e-004	MA1697.1 (ARF4)
MEME-5	TCTTGGCYGTAGCATCAATTGCKSGCCGYT	30	3	2.60e-003	MA1375.1 (ANL2)
MEME-6	CAACAGTGTGCATCRATGTCCCCTCYC	27	3	6.80e-003	CAACAGTGTGCATCRATGTCCCCTCYC
MEME-7	GCCTTGCAAATGSMTGTCACTTAGTCTT	28	3	1.40e-002	GCCTTGCAAATGSMTGTCACTTAGTCTT	MA1358.1 (bHLH130)
# XSTREME (Motif Discovery and Enrichment Analysis): Version 5.5.3 released on Sat Jun 10 16:19:38 2023 -0700
# The format of this file is described at https://meme-suite.org/meme/doc/xstreme-output-format.html
# xstreme --oc . --time 240 --streme-totallength 4000000 --meme-searchsize 100000 --dna --evt 0.05 --minw 6 --maxw 30 --parse-genomic-coord --align center --streme-evt 0.05 --meme-evt 0.05 --meme-mod zoops --sea-noseqs --m db/motif_databases/JASPAR/JASPAR2022_CORE_plants_non-redundant_v2.meme --p Promotores_RA1-B_Andro.txt

## Sheet: Sheet 7
RA1-like B Paniceae
ALT_ID	CONSENSUS	WIDTH	SITES	EVALUE	SIM_MOTIF	Tomtom
MEME-1	GAGCTGGACATGACACCTTGACCAATCATG	30	5	2.70e-024	MA0950.1 (ATHB-12)
MEME-2	CGCTTTCAGTGCCTCGGTAACACRCCTGCA	30	5	1.90e-023	MA0053.1 (MNB1A)
MEME-3	GTCTTCCCCGGAATGGCKGCCATTGCTCTG	30	5	4.60e-023	GTCTTCCCCGGAATGGCKGCCATTGCTCTG	MA1377.1 (PLT1)
MEME-4	GTATCTTGGCTGTWGCATCAATTGCATGCC	30	5	6.70e-023	MA0564.1 (ABI3)
MEME-5	CCTGCACGCCTTGCAAATGCATGTCACTTA	30	5	1.00e-021	MA0565.2 (FUS3)
MEME-6	TGGCTGGCTTCAGGCGTCTTGTCGTGCAGA	30	5	1.60e-020	MA1697.1 (ARF4)
MEME-7	GCGCAAGGAGTTGGAGTRAGCCAGAAGCAA	30	5	5.60e-019	GCGCAAGGAGTTGGAGTRAGCCAGAAGCAA	MA2006.1 (NAC020)
MEME-8	TCACCTTTCYGTGAGCATCATGCCYTCCCA	30	5	1.50e-018	MA1201.1 (AGL42)
MEME-9	AGAACCGAGCAGAACGAGTTGACYCAAAMA	30	5	1.10e-014	MA1093.1 (WRKY75)
MEME-11	STGGATTTAATCYTGGACATGACTGATG	28	5	7.20e-010	STGGATTTAATCYTGGACATGACTGATG	MA0933.1 (AHL20)
MEME-12	ATCTCTTGCTGAAGAAAHCAAAAGAAAATG	30	5	2.90e-009	MA1823.1 (Zm00001d027846)
MEME-13	RRAMATRAYACATGGAGTAAGGCCATHGA	29	5	6.80e-006	RRAMATRAYACATGGAGTAAGGCCATHGA	MA0941.1 (ABF2)
MEME-14	TTGATCCTRGTAAAHACTTGGCAGCACACA	30	5	2.40e-005	TTGATCCTRGTAAAHACTTGGCAGCACACA	MA1054.1 (TCP4)
MEME-15	GTRGTWAGYAVAAGGATAAAAGAAAYGCTA	30	5	2.10e-003	MA1274.1 (DOF3.6)
MEME-17	AADGGGGMAAGTRCTGCATGSBTCM	25	5	3.30e-002	MA0564.1 (ABI3)
MEME-10	CCTCCCCTAGGAHTCACGGTCAGATTCACA	30	4	1.00e-011	CCTCCCCTAGGAHTCACGGTCAGATTCACA	MA1394.2 (MYB73)
MEME-16	GCCYACCCCTGCCCACTGAGADGTG	25	4	9.40e-003	GCCYACCCCTGCCCACTGAGADGTG	MA1263.1 (ERF055)
# XSTREME (Motif Discovery and Enrichment Analysis): Version 5.5.3 released on Sat Jun 10 16:19:38 2023 -0700
# The format of this file is described at https://meme-suite.org/meme/doc/xstreme-output-format.html
# xstreme --oc . --time 240 --streme-totallength 4000000 --meme-searchsize 100000 --dna --evt 0.05 --minw 6 --maxw 30 --parse-genomic-coord --align center --streme-evt 0.05 --meme-evt 0.05 --meme-mod zoops --sea-noseqs --m db/motif_databases/JASPAR/JASPAR2022_CORE_plants_non-redundant_v2.meme --p Promotores_RA1-B_no_Andro.txt

## Sheet: Sheet 8
RA1-like B BOP
ALT_ID	CONSENSUS	WIDTH	SITES	EVALUE	SIM_MOTIF	Tomtom
MEME-1	CWTTGCAAACACATGTCACWTAGTCTTCCC	30	6	3.40e-030	CWTTGCAAACACATGTCACWTAGTCTTCCC	MA0931.1 (ABI5)
MEME-2	GYTCTGASGGTATCTYGGYYGCMACATCR	29	6	1.90e-013	MA1409.1 (OsRR22)
MEME-3	AMAATTACWTCAYCTTTCTRWBRGCATCAT	30	6	5.40e-010	MA1201.1 (AGL42)
MEME-4	GRTGTCTTGTCSWGMRGRRAARBMGNCKSM	30	6	2.10e-009	MA1688.1 (ARF16)
MEME-6	GCCANGTAYGCTTTCRGRRCATCGGTARC	29	6	9.40e-007	GCCANGTAYGCTTTCRGRRCATCGGTARC	MA1345.1 (BZIP48)
MEME-7	TGAYTGATGKGATGTMTTRCWGMT	24	6	4.00e-006	MA1324.1 (GATA20)
MEME-8	GCCTTCARTCTTKCGMCCGAKTKGRCNCAR	30	6	9.60e-006	GCCTTCARTCTTKCGMCCGAKTKGRCNCAR	MA1012.1 (AGL27)
MEME-5	GCWGGAGTGAGTCAGAAGCAARCMANA	27	5	2.60e-008	MA2048.1 (NAC045)
# XSTREME (Motif Discovery and Enrichment Analysis): Version 5.5.3 released on Sat Jun 10 16:19:38 2023 -0700
# The format of this file is described at https://meme-suite.org/meme/doc/xstreme-output-format.html
# xstreme --oc . --time 240 --streme-totallength 4000000 --meme-searchsize 100000 --dna --evt 0.05 --minw 6 --maxw 30 --parse-genomic-coord --align center --streme-evt 0.05 --meme-evt 0.05 --meme-mod zoops --sea-noseqs --m db/motif_databases/JASPAR/JASPAR2022_CORE_plants_non-redundant_v2.meme --p Promotores_RA1-B_BOP.txt
