# Supplementary material for: Molecular Evolution of RAMOSA1 (RA1) in Land Plants
Source: Preprints.org preprint supplement (doi:10.20944/preprints202404.0730.v1), 2024-04-10
Supplement: Supplementary file 7 [file supplementary]

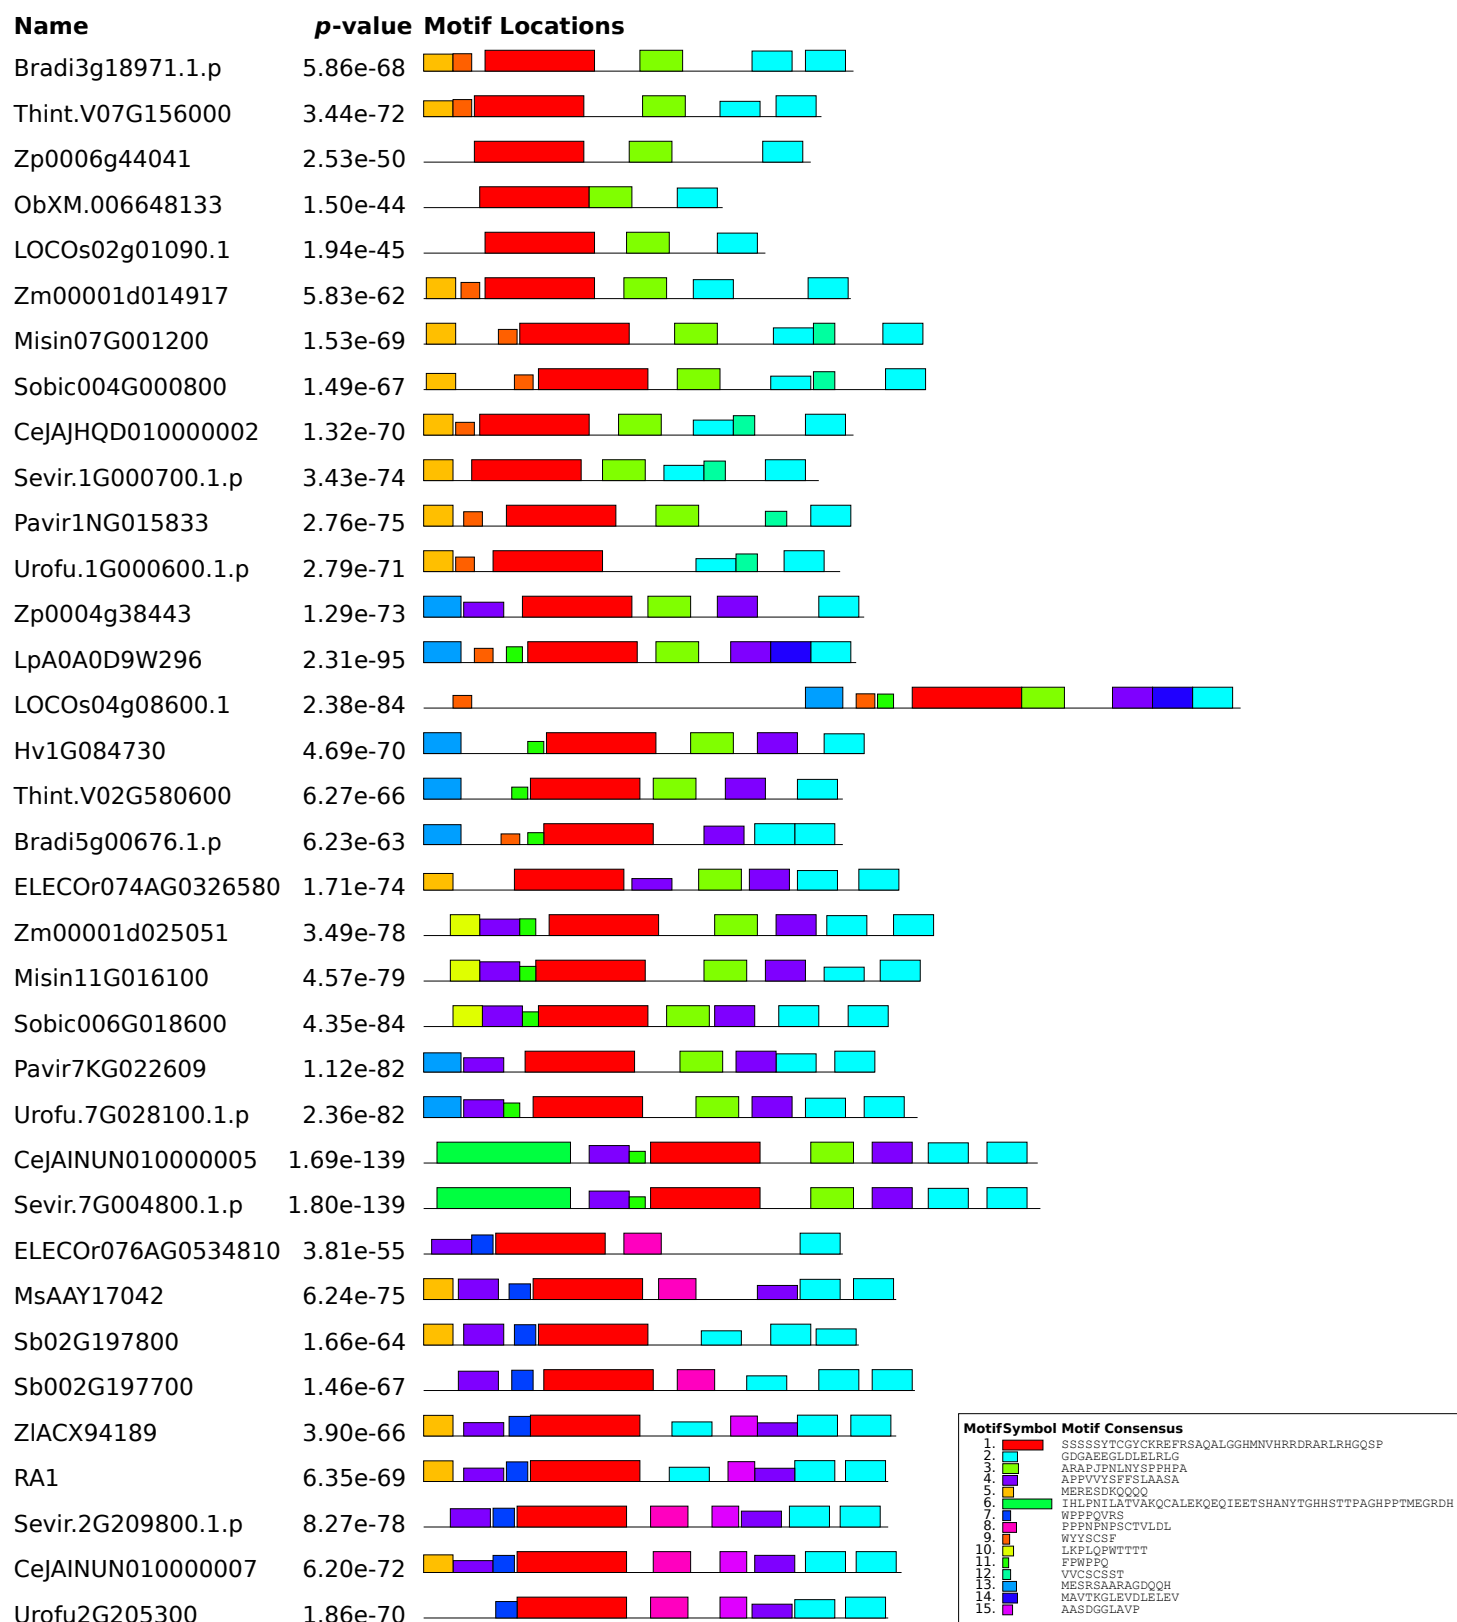

**Figure S7.** Schematic distribution of conserved motifs in RA1 and RA1-like amino acid sequences identified by MEME. The fifteen motifs are represented in different colours. Motif 1 represents the conserved zinc finger domain. Motif 2 represents the conserved EAR domain.
