# Supplementary material for: Molecular Evolution of RAMOSA1 (RA1) in Land Plants
Source: Preprints.org preprint supplement (doi:10.20944/preprints202404.0730.v1), 2024-04-10
Supplement: Supplementary file 7 [file Table S6.xlsx]

## Sheet: SMZ-motif
GENE PRODUCT DB	GENE PRODUCT ID	SYMBOL	QUALIFIER	GO TERM	GO NAME	GO ASPECT
UniProtKB	Q6PV68	SMZ	enables	GO:0003677	DNA binding	F		References:
UniProtKB	Q6PV68	SMZ	enables	GO:0003700	DNA-binding transcription factor activity	F		F: molecular function
UniProtKB	Q6PV68	SMZ	involved_in	GO:0006355	regulation of DNA-templated transcription	P		C: cellular component
UniProtKB	Q6PV68	SMZ	enables	GO:0003677	DNA binding	F		P: biological proccess
UniProtKB	Q6PV68	SMZ	located_in	GO:0005634	nucleus	C
UniProtKB	Q6PV68	SMZ	involved_in	GO:0009873	ethylene-activated signaling pathway	P
UniProtKB	Q6PV68	SMZ	acts_upstream_of_or_within	GO:0009658	chloroplast organization	P
UniProtKB	Q6PV68	SMZ	enables	GO:0000976	transcription cis-regulatory region binding	F
UniProtKB	Q6PV68	SMZ	enables	GO:0003700	DNA-binding transcription factor activity	F
UniProtKB	Q6PV68	SMZ	located_in	GO:0005634	nucleus	C

## Sheet: ABI3-motif
GENE PRODUCT DB	GENE PRODUCT ID	SYMBOL	QUALIFIER	GO TERM	GO NAME	GO ASPECT
UniProtKB	Q01593	ABI3	located_in	GO:0005634	nucleus	C		References:
UniProtKB	Q01593	ABI3	located_in	GO:0005829	cytosol	C		F: molecular function
UniProtKB	Q01593	ABI3	enables	GO:0005515	protein binding	F		C: cellular component
UniProtKB	Q01593	ABI3	enables	GO:0005515	protein binding	F		P: biological proccess
UniProtKB	Q01593	ABI3	enables	GO:0005515	protein binding	F
UniProtKB	Q01593	ABI3	enables	GO:0005515	protein binding	F
UniProtKB	Q01593	ABI3	enables	GO:0005515	protein binding	F
UniProtKB	Q01593	ABI3	enables	GO:0005515	protein binding	F
UniProtKB	Q01593	ABI3	enables	GO:0005515	protein binding	F
UniProtKB	Q01593	ABI3	enables	GO:0003677	DNA binding	F
UniProtKB	Q01593	ABI3	enables	GO:0003700	DNA-binding transcription factor activity	F
UniProtKB	Q01593	ABI3	enables	GO:0003677	DNA binding	F
UniProtKB	Q01593	ABI3	located_in	GO:0005634	nucleus	C
UniProtKB	Q01593	ABI3	located_in	GO:0005737	cytoplasm	C
UniProtKB	Q01593	ABI3	involved_in	GO:0009738	abscisic acid-activated signaling pathway	P
UniProtKB	Q01593	ABI3	enables	GO:0003677	DNA binding	F
UniProtKB	Q01593	ABI3	enables	GO:0003700	DNA-binding transcription factor activity	F
UniProtKB	Q01593	ABI3	enables	GO:0003700	DNA-binding transcription factor activity	F
UniProtKB	Q01593	ABI3	acts_upstream_of_or_within	GO:0045893	positive regulation of DNA-templated transcription	P
UniProtKB	Q01593	ABI3	acts_upstream_of_or_within	GO:0045893	positive regulation of DNA-templated transcription	P
UniProtKB	Q01593	ABI3	acts_upstream_of_or_within	GO:0009793	embryo development ending in seed dormancy	P
UniProtKB	Q01593	ABI3	acts_upstream_of_or_within	GO:0031930	mitochondria-nucleus signaling pathway	P
UniProtKB	Q01593	ABI3	enables	GO:0043565	sequence-specific DNA binding	F
UniProtKB	Q01593	ABI3	acts_upstream_of_or_within	GO:0009657	plastid organization	P
UniProtKB	Q01593	ABI3	acts_upstream_of_or_within	GO:0009733	response to auxin	P
UniProtKB	Q01593	ABI3	acts_upstream_of_or_within	GO:0009737	response to abscisic acid	P
UniProtKB	Q01593	ABI3	enables	GO:0003700	DNA-binding transcription factor activity	F
UniProtKB	Q01593	ABI3	enables	GO:0003700	DNA-binding transcription factor activity	F
UniProtKB	Q01593	ABI3	enables	GO:0005515	protein binding	F
UniProtKB	Q01593	ABI3	enables	GO:0005515	protein binding	F
UniProtKB	Q01593	ABI3	located_in	GO:0005634	nucleus	C
UniProtKB	Q01593	ABI3	located_in	GO:0005737	cytoplasm	C

## Sheet: ABI5-motif
GENE PRODUCT DB	GENE PRODUCT ID	SYMBOL	QUALIFIER	GO TERM	GO NAME	GO ASPECT
UniProtKB	Q9SJN0	ABI5	enables	GO:0005515	protein binding	F		References:
UniProtKB	Q9SJN0	ABI5	enables	GO:0005515	protein binding	F		F: molecular function
UniProtKB	Q9SJN0	ABI5	enables	GO:0005515	protein binding	F		C: cellular component
UniProtKB	Q9SJN0	ABI5	enables	GO:0005515	protein binding	F		P: biological proccess
UniProtKB	Q9SJN0	ABI5	enables	GO:0005515	protein binding	F
UniProtKB	Q9SJN0	ABI5	enables	GO:0003700	DNA-binding transcription factor activity	F
UniProtKB	Q9SJN0	ABI5	involved_in	GO:0045893	positive regulation of DNA-templated transcription	P
UniProtKB	Q9SJN0	ABI5	involved_in	GO:0006355	regulation of DNA-templated transcription	P
UniProtKB	Q9SJN0	ABI5	enables	GO:0003677	DNA binding	F
UniProtKB	Q9SJN0	ABI5	located_in	GO:0005634	nucleus	C
UniProtKB	Q9SJN0	ABI5	involved_in	GO:0009738	abscisic acid-activated signaling pathway	P
UniProtKB	Q9SJN0	ABI5	acts_upstream_of_or_within	GO:0045893	positive regulation of DNA-templated transcription	P
UniProtKB	Q9SJN0	ABI5	acts_upstream_of_or_within	GO:0045893	positive regulation of DNA-templated transcription	P
UniProtKB	Q9SJN0	ABI5	located_in	GO:0005634	nucleus	C
UniProtKB	Q9SJN0	ABI5	acts_upstream_of_or_within	GO:0009414	response to water deprivation	P
UniProtKB	Q9SJN0	ABI5	acts_upstream_of_or_within	GO:0009651	response to salt stress	P
UniProtKB	Q9SJN0	ABI5	acts_upstream_of_or_within	GO:0009737	response to abscisic acid	P
UniProtKB	Q9SJN0	ABI5	acts_upstream_of_or_within	GO:0009737	response to abscisic acid	P
UniProtKB	Q9SJN0	ABI5	acts_upstream_of_or_within	GO:0009739	response to gibberellin	P
UniProtKB	Q9SJN0	ABI5	acts_upstream_of_or_within	GO:0009845	seed germination	P
UniProtKB	Q9SJN0	ABI5	acts_upstream_of_or_within	GO:0010182	sugar mediated signaling pathway	P
UniProtKB	Q9SJN0	ABI5	acts_upstream_of_or_within	GO:0048316	seed development	P
UniProtKB	Q9SJN0	ABI5	acts_upstream_of_or_within	GO:0009737	response to abscisic acid	P
UniProtKB	Q9SJN0	ABI5	acts_upstream_of_or_within	GO:0010187	negative regulation of seed germination	P
UniProtKB	Q9SJN0	ABI5	acts_upstream_of_or_within	GO:0006355	regulation of DNA-templated transcription	P
UniProtKB	Q9SJN0	ABI5	enables	GO:0000976	transcription cis-regulatory region binding	F
UniProtKB	Q9SJN0	ABI5	enables	GO:0000976	transcription cis-regulatory region binding	F
UniProtKB	Q9SJN0	ABI5	enables	GO:0000976	transcription cis-regulatory region binding	F
UniProtKB	Q9SJN0	ABI5	enables	GO:0003700	DNA-binding transcription factor activity	F
UniProtKB	Q9SJN0	ABI5	enables	GO:0003700	DNA-binding transcription factor activity	F
UniProtKB	Q9SJN0	ABI5	enables	GO:0005515	protein binding	F
UniProtKB	Q9SJN0	ABI5	enables	GO:0005515	protein binding	F
UniProtKB	Q9SJN0	ABI5	enables	GO:0005515	protein binding	F
UniProtKB	Q9SJN0	ABI5	enables	GO:0005515	protein binding	F
UniProtKB	Q9SJN0	ABI5	enables	GO:0005515	protein binding	F
UniProtKB	Q9SJN0	ABI5	enables	GO:0005515	protein binding	F
UniProtKB	Q9SJN0	ABI5	located_in	GO:0005634	nucleus	C

## Sheet: FUS3-motif
GENE PRODUCT DB	GENE PRODUCT ID	SYMBOL	QUALIFIER	GO TERM	GO NAME	GO ASPECT
UniProtKB	Q9LW31	FUS3	involved_in	GO:0045995	regulation of embryonic development	P		References:
UniProtKB	Q9LW31	FUS3	involved_in	GO:0099402	plant organ development	P		F: molecular function
UniProtKB	Q9LW31	FUS3	involved_in	GO:0009789	positive regulation of abscisic acid-activated signaling pathway	P		C: cellular component
UniProtKB	Q9LW31	FUS3	involved_in	GO:0010228	vegetative to reproductive phase transition of meristem	P		P: biological proccess
UniProtKB	Q9LW31	FUS3	enables	GO:0019900	kinase binding	F
UniProtKB	Q9LW31	FUS3	enables	GO:0003677	DNA binding	F
UniProtKB	Q9LW31	FUS3	enables	GO:0003700	DNA-binding transcription factor activity	F
UniProtKB	Q9LW31	FUS3	enables	GO:0003677	DNA binding	F
UniProtKB	Q9LW31	FUS3	located_in	GO:0005634	nucleus	C
UniProtKB	Q9LW31	FUS3	enables	GO:0003677	DNA binding	F
UniProtKB	Q9LW31	FUS3	acts_upstream_of_or_within	GO:0009733	response to auxin	P
UniProtKB	Q9LW31	FUS3	acts_upstream_of_or_within	GO:0009793	embryo development ending in seed dormancy	P
UniProtKB	Q9LW31	FUS3	acts_upstream_of_or_within	GO:0010116	positive regulation of abscisic acid biosynthetic process	P
UniProtKB	Q9LW31	FUS3	acts_upstream_of_or_within	GO:0010262	somatic embryogenesis	P
UniProtKB	Q9LW31	FUS3	acts_upstream_of_or_within	GO:0010373	negative regulation of gibberellin biosynthetic process	P
UniProtKB	Q9LW31	FUS3	enables	GO:0003700	DNA-binding transcription factor activity	F
UniProtKB	Q9LW31	FUS3	located_in	GO:0005634	nucleus	C
UniProtKB	Q9LW31	FUS3	involved_in	GO:0006355	regulation of DNA-templated transcription	P
UniProtKB	Q9LW31	FUS3	involved_in	GO:0006355	regulation of DNA-templated transcription	P
UniProtKB	Q9LW31	FUS3	involved_in	GO:0008284	positive regulation of cell population proliferation	P
UniProtKB	Q9LW31	FUS3	involved_in	GO:0010373	negative regulation of gibberellin biosynthetic process	P

## Sheet: SPL14-motif
GENE PRODUCT DB	GENE PRODUCT ID	SYMBOL	QUALIFIER	GO TERM	GO NAME	GO ASPECT
UniProtKB	Q8RY95	SPL14	enables	GO:0003677	DNA binding	F		References:
UniProtKB	Q8RY95	SPL14	located_in	GO:0005634	nucleus	C		F: molecular function
UniProtKB	Q8RY95	SPL14	enables	GO:0003677	DNA binding	F		C: cellular component
UniProtKB	Q8RY95	SPL14	located_in	GO:0005634	nucleus	C		P: biological proccess
UniProtKB	Q8RY95	SPL14	located_in	GO:0005737	cytoplasm	C
UniProtKB	Q8RY95	SPL14	enables	GO:0046872	metal ion binding	F
UniProtKB	Q8RY95	SPL14	enables	GO:0003677	DNA binding	F
UniProtKB	Q8RY95	SPL14	acts_upstream_of_or_within	GO:0045893	positive regulation of DNA-templated transcription	P
UniProtKB	Q8RY95	SPL14	located_in	GO:0005634	nucleus	C
UniProtKB	Q8RY95	SPL14	acts_upstream_of_or_within	GO:0006355	regulation of DNA-templated transcription	P
UniProtKB	Q8RY95	SPL14	acts_upstream_of_or_within	GO:0006355	regulation of DNA-templated transcription	P
UniProtKB	Q8RY95	SPL14	enables	GO:0003700	DNA-binding transcription factor activity	F
UniProtKB	Q8RY95	SPL14	enables	GO:0005515	protein binding	F
UniProtKB	Q8RY95	SPL14	located_in	GO:0005634	nucleus	C
UniProtKB	Q8RY95	SPL14	located_in	GO:0005737	cytoplasm	C

## Sheet: AHL20-motif
GENE PRODUCT DB	GENE PRODUCT ID	SYMBOL	QUALIFIER	GO TERM	GO NAME	GO ASPECT
UniProtKB	Q8GWQ2	AHL20	involved_in	GO:0045824	negative regulation of innate immune response	P		References:
UniProtKB	Q8GWQ2	AHL20	involved_in	GO:1900425	negative regulation of defense response to bacterium	P		F: molecular function
UniProtKB	Q8GWQ2	AHL20	enables	GO:0003680	minor groove of adenine-thymine-rich DNA binding	F		C: cellular component
UniProtKB	Q8GWQ2	AHL20	enables	GO:0003677	DNA binding	F		P: biological proccess
UniProtKB	Q8GWQ2	AHL20	involved_in	GO:0045087	innate immune response	P
UniProtKB	Q8GWQ2	AHL20	located_in	GO:0005634	nucleus	C
UniProtKB	Q8GWQ2	AHL20	involved_in	GO:0002376	immune system process	P
UniProtKB	Q8GWQ2	AHL20	involved_in	GO:0006952	defense response	P
UniProtKB	Q8GWQ2	AHL20	acts_upstream_of_or_within	GO:2000028	regulation of photoperiodism, flowering	P
UniProtKB	Q8GWQ2	AHL20	acts_upstream_of_or_within	GO:0042742	defense response to bacterium	P
UniProtKB	Q8GWQ2	AHL20	enables	GO:0005515	protein binding	F
UniProtKB	Q8GWQ2	AHL20	enables	GO:0043621	protein self-association	F
UniProtKB	Q8GWQ2	AHL20	located_in	GO:0005634	nucleus	C

## Sheet: ABF2-motif
GENE PRODUCT DB	GENE PRODUCT ID	SYMBOL	QUALIFIER	GO TERM	GO NAME	GO ASPECT
UniProtKB	Q9M7Q4	ABF2	is_active_in	GO:0005634	nucleus	C		References:
UniProtKB	Q9M7Q4	ABF2	located_in	GO:0005634	nucleus	C		F: molecular function
UniProtKB	Q9M7Q4	ABF2	enables	GO:0005515	protein binding	F		C: cellular component
UniProtKB	Q9M7Q4	ABF2	enables	GO:0003700	DNA-binding transcription factor activity	F		P: biological proccess
UniProtKB	Q9M7Q4	ABF2	involved_in	GO:0045893	positive regulation of DNA-templated transcription	P
UniProtKB	Q9M7Q4	ABF2	involved_in	GO:0006355	regulation of DNA-templated transcription	P
UniProtKB	Q9M7Q4	ABF2	enables	GO:0003677	DNA binding	F
UniProtKB	Q9M7Q4	ABF2	located_in	GO:0005634	nucleus	C
UniProtKB	Q9M7Q4	ABF2	involved_in	GO:0009738	abscisic acid-activated signaling pathway	P
UniProtKB	Q9M7Q4	ABF2	enables	GO:0005515	protein binding	F
UniProtKB	Q9M7Q4	ABF2	located_in	GO:0005634	nucleus	C

## Sheet: ATHB12-motif
GENE PRODUCT DB	GENE PRODUCT ID	SYMBOL	QUALIFIER	GO TERM	GO NAME	GO ASPECT
UniProtKB	Q9M276	ATHB-12	enables	GO:0005515	protein binding	F
UniProtKB	Q9M276	ATHB-12	enables	GO:0000981	DNA-binding transcription factor activity, RNA polymerase II-specific	F
UniProtKB	Q9M276	ATHB-12	enables	GO:0003677	DNA binding	F
UniProtKB	Q9M276	ATHB-12	enables	GO:0003700	DNA-binding transcription factor activity	F
UniProtKB	Q9M276	ATHB-12	enables	GO:0043565	sequence-specific DNA binding	F
UniProtKB	Q9M276	ATHB-12	involved_in	GO:0006355	regulation of DNA-templated transcription	P		References:
UniProtKB	Q9M276	ATHB-12	enables	GO:0003677	DNA binding	F		F: molecular function
UniProtKB	Q9M276	ATHB-12	enables	GO:0003677	DNA binding	F		C: cellular component
UniProtKB	Q9M276	ATHB-12	located_in	GO:0005634	nucleus	C		P: biological proccess
UniProtKB	Q9M276	ATHB-12	acts_upstream_of_or_within	GO:0045893	positive regulation of DNA-templated transcription	P
UniProtKB	Q9M276	ATHB-12	located_in	GO:0005634	nucleus	C
UniProtKB	Q9M276	ATHB-12	acts_upstream_of_or_within	GO:0009414	response to water deprivation	P
UniProtKB	Q9M276	ATHB-12	acts_upstream_of_or_within	GO:0009615	response to virus	P
UniProtKB	Q9M276	ATHB-12	acts_upstream_of_or_within	GO:0009737	response to abscisic acid	P
UniProtKB	Q9M276	ATHB-12	acts_upstream_of_or_within	GO:0006970	response to osmotic stress	P
UniProtKB	Q9M276	ATHB-12	acts_upstream_of_or_within	GO:0009737	response to abscisic acid	P
UniProtKB	Q9M276	ATHB-12	enables	GO:0000976	transcription cis-regulatory region binding	F
UniProtKB	Q9M276	ATHB-12	enables	GO:0000976	transcription cis-regulatory region binding	F
UniProtKB	Q9M276	ATHB-12	enables	GO:0000976	transcription cis-regulatory region binding	F
UniProtKB	Q9M276	ATHB-12	enables	GO:0000976	transcription cis-regulatory region binding	F
UniProtKB	Q9M276	ATHB-12	enables	GO:0003700	DNA-binding transcription factor activity	F
UniProtKB	Q9M276	ATHB-12	located_in	GO:0005634	nucleus	C
UniProtKB	Q9M276	ATHB-12	involved_in	GO:0006357	regulation of transcription by RNA polymerase II	P

## Sheet: DRED1E-motif
GENE PRODUCT DB	GENE PRODUCT ID	SYMBOL	QUALIFIER	GO TERM	GO NAME	GO ASPECT
UniProtKB	Q9SGJ6	DREB1E	enables	GO:0003677	DNA binding	F		References:
UniProtKB	Q9SGJ6	DREB1E	enables	GO:0003700	DNA-binding transcription factor activity	F		F: molecular function
UniProtKB	Q9SGJ6	DREB1E	involved_in	GO:0006355	regulation of DNA-templated transcription	P		C: cellular component
UniProtKB	Q9SGJ6	DREB1E	enables	GO:0003677	DNA binding	F		P: biological proccess
UniProtKB	Q9SGJ6	DREB1E	located_in	GO:0005634	nucleus	C
UniProtKB	Q9SGJ6	DREB1E	acts_upstream_of_or_within	GO:0048510	regulation of timing of transition from vegetative to reproductive phase	P
UniProtKB	Q9SGJ6	DREB1E	acts_upstream_of_or_within	GO:0010371	regulation of gibberellin biosynthetic process	P
UniProtKB	Q9SGJ6	DREB1E	enables	GO:0003700	DNA-binding transcription factor activity	F
UniProtKB	Q9SGJ6	DREB1E	located_in	GO:0005634	nucleus	C

## Sheet: ERF008-motif
GENE PRODUCT DB	GENE PRODUCT ID	SYMBOL	QUALIFIER	GO TERM	GO NAME	GO ASPECT
UniProtKB	O22174	ERF008	enables	GO:0003677	DNA binding	F		References:
UniProtKB	O22174	ERF008	enables	GO:0003700	DNA-binding transcription factor activity	F		F: molecular function
UniProtKB	O22174	ERF008	involved_in	GO:0006355	regulation of DNA-templated transcription	P		C: cellular component
UniProtKB	O22174	ERF008	enables	GO:0003677	DNA binding	F		P: biological proccess
UniProtKB	O22174	ERF008	located_in	GO:0005634	nucleus	C
UniProtKB	O22174	ERF008	involved_in	GO:0009873	ethylene-activated signaling pathway	P
UniProtKB	O22174	ERF008	enables	GO:0000976	transcription cis-regulatory region binding	F
UniProtKB	O22174	ERF008	enables	GO:0003700	DNA-binding transcription factor activity	F
UniProtKB	O22174	ERF008	located_in	GO:0005634	nucleus	C

[truncated: 34 more sheets: ERF055-motif, ERF115-motif, AGL27-motif, AGL42-motif, NAC020-motif, NAC045-motif, NAC92-motif, TCP5-motif, TCP4-motif, WRKY62-motif, WRKY75-motif, CDF5-motif, DOF3.6-motif, GATA20-motif, BZIP48-motif, TGA9-motif, BHLH130-motif, ANL2-motif, PLT1-motif, HHO3-motif …]
