# Supplementary material for: Molecular Evolution of RAMOSA1 (RA1) in Land Plants
Source: Preprints.org preprint supplement (doi:10.20944/preprints202404.0730.v1), 2024-04-10
Supplement: Supplementary file 8 [file supplementary]

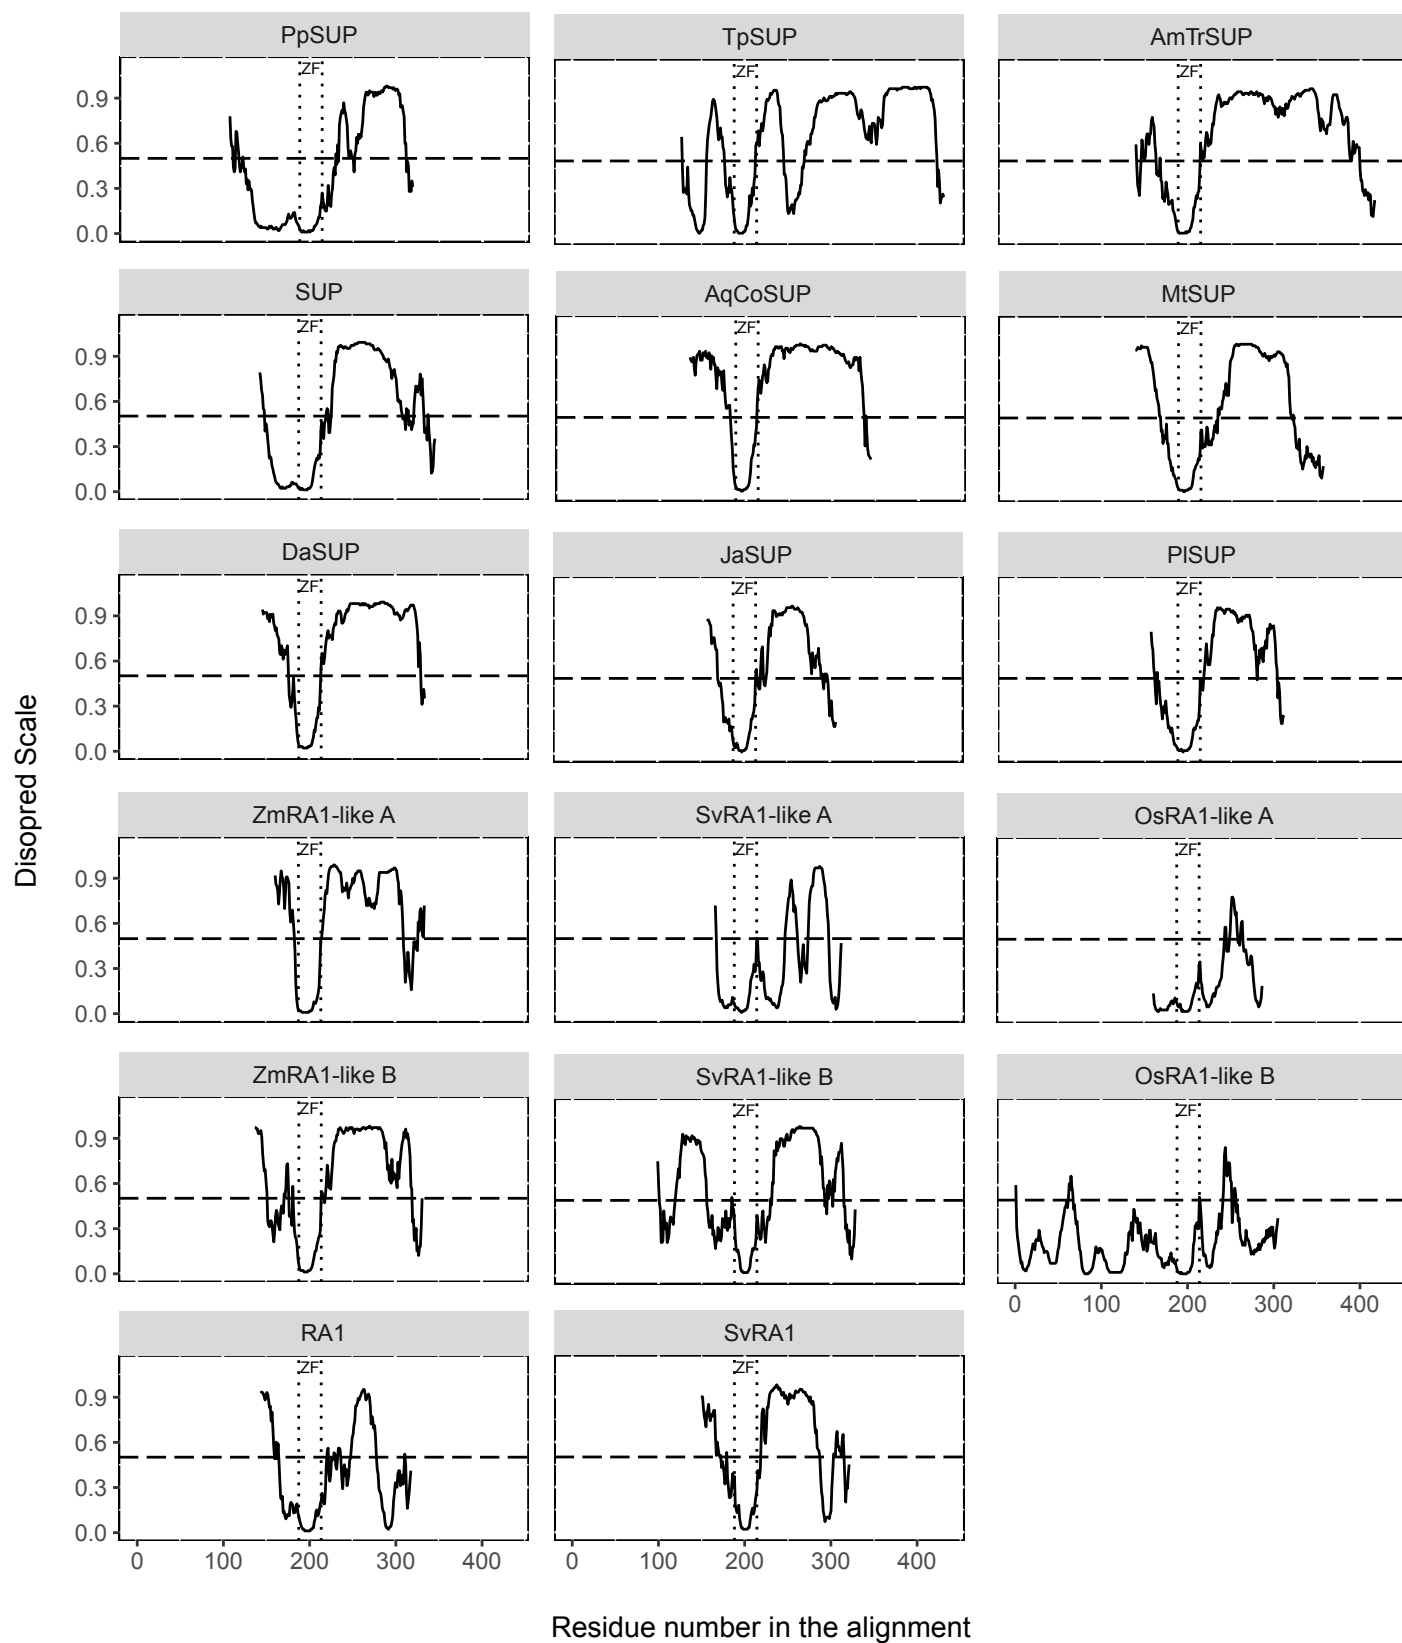

**Figure S10.** Proteins conformational plasticity. Relative disorder levels of the structures measured in a range of 0 to 1.0, following the algorithms used by DisoPred 3.1 server. With a level of disorder above 0.5 (dashed line), the protein is considered disordered. The region corresponding to the zinc finger (ZF) domain is marked in the figure.
