# Supplementary material for: Molecular Evolution of RAMOSA1 (RA1) in Land Plants
Source: Preprints.org preprint supplement (doi:10.20944/preprints202404.0730.v1), 2024-04-10
Supplement: Supplementary file 9 [file supplementary]

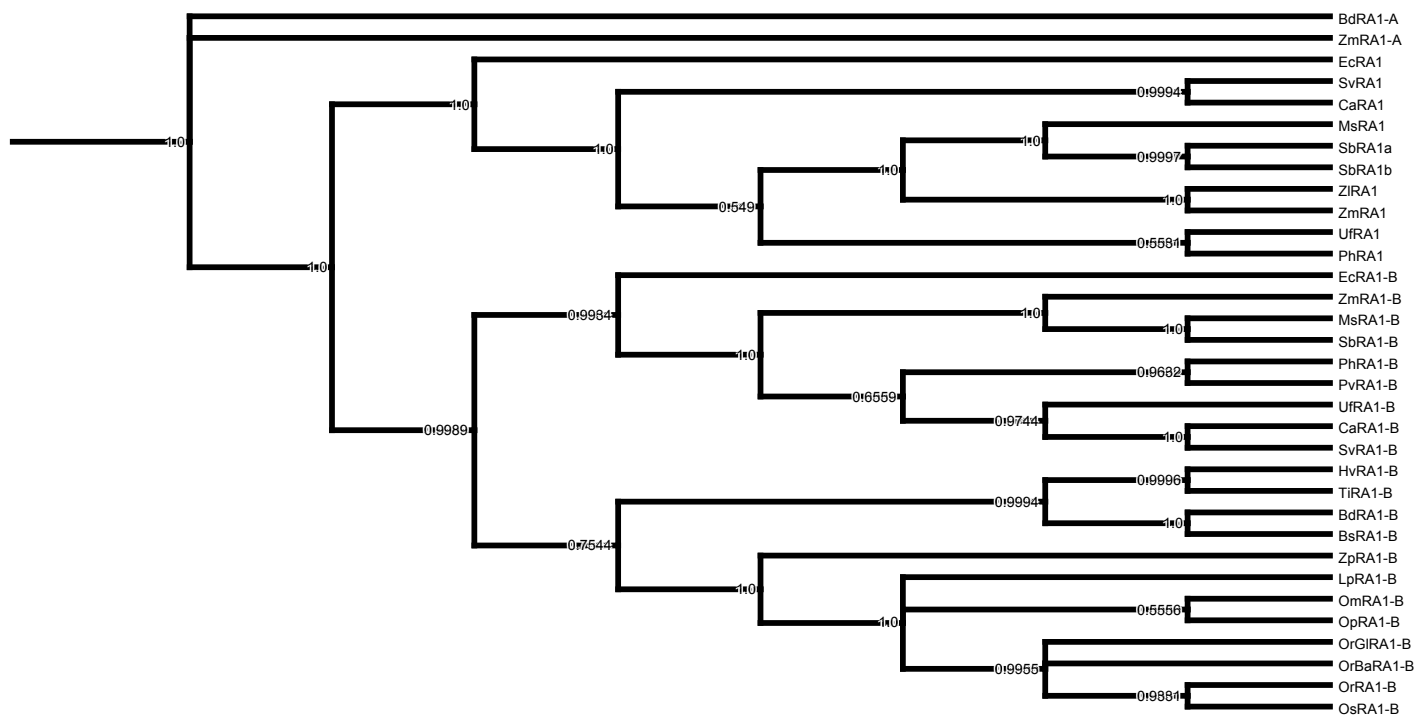

**Figure S3.** Resolved phylogenetic tree between RA1 and RA1-like B. Majority rule consensus tree (N=22502 trees) of RA1 and RA1-like B TFs in grasses generated by Bayesian inference using 33 amino acid sequences dataset. BdRA1-A and ZmRA1-A were used as outgroups.
