# Supplementary material for: Molecular Evolution of RAMOSA1 (RA1) in Land Plants
Source: Preprints.org preprint supplement (doi:10.20944/preprints202404.0730.v1), 2024-04-10
Supplement: Supplementary file 10 [file supplementary]

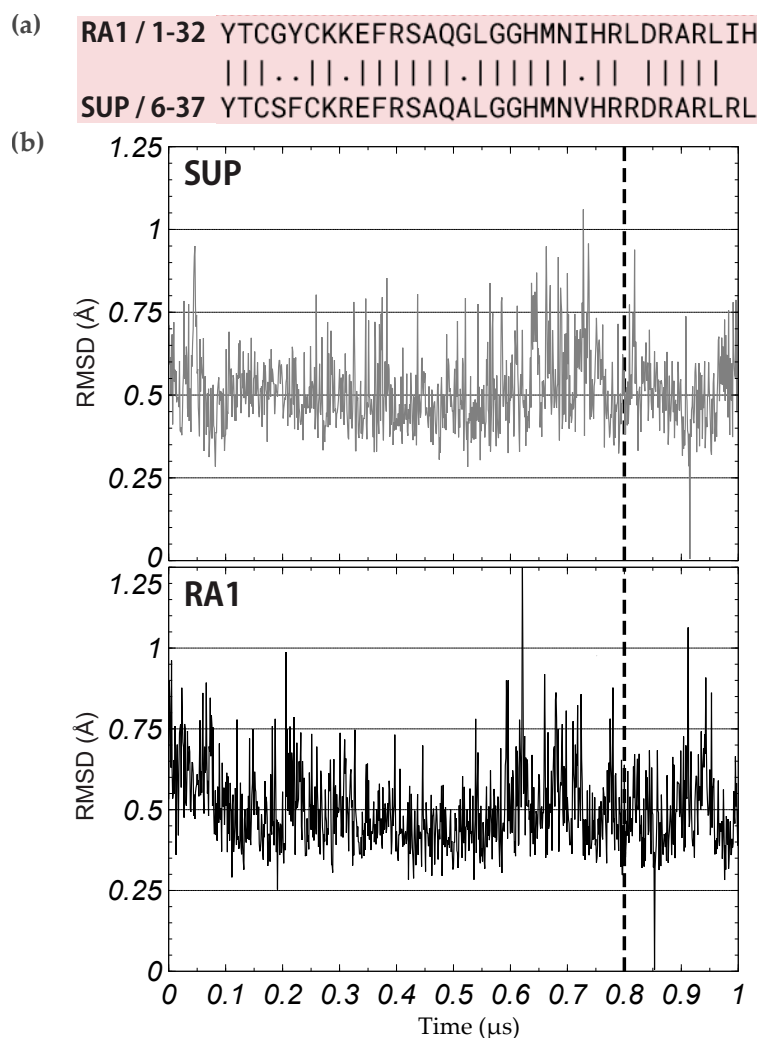

**Figure S11.** Zinc finger dynamic simulation. (a) Local sequence alignment of RA1 and SUP zinc finger domain as determined by Smith-Watermann algorithm (residue identity 75%). (b) Time evolution of the RMSD of the backbone atoms of the RA1 (above) and SUP (bellow) amino acid sequences in the simulated interval 0.0 to 1.0  $\mu$ s. The structure with the smallest RMSD in the interval 0.0 to 1.0  $\mu$ s of each simulation has been used as reference for fitting the structures of each sequence. The vertical gray dashed line at 0.8  $\mu$ s marks the time that has been assumed as the beginning of the thermodynamic equilibrium interval for properties calculations.
