# Supplementary material for: Molecular Evolution of RAMOSA1 (RA1) in Land Plants
Source: Preprints.org preprint supplement (doi:10.20944/preprints202404.0730.v1), 2024-04-10
Supplement: Supplementary file 11 [file supplementary]

Archive with 17 entries (17 files):
- Supplementary Files FINAL/Figure S7.pdf
- Supplementary Files FINAL/Figure S11.pdf
- Supplementary Files FINAL/Figure S3.pdf
- Supplementary Files FINAL/Figure S9.pdf
- Supplementary Files FINAL/Figure S4.pdf
- Supplementary Files FINAL/Table S2.xlsx
- Supplementary Files FINAL/Figure S2.pdf
- Supplementary Files FINAL/Table S3.xlsx
- Supplementary Files FINAL/Figure S1.pdf
- Supplementary Files FINAL/Table S1.xlsx
- Supplementary Files FINAL/Figure S10.pdf
- Supplementary Files FINAL/Figure S6.pdf
- Supplementary Files FINAL/Table S5.xlsx
- Supplementary Files FINAL/Table S4.xlsx
- Supplementary Files FINAL/Figure S5.pdf
- Supplementary Files FINAL/Table S6.xlsx
- Supplementary Files FINAL/Figure S8.pdf
