# Supplementary material for: Molecular Evolution of RAMOSA1 (RA1) in Land Plants
Source: Preprints.org preprint supplement (doi:10.20944/preprints202404.0730.v1), 2024-04-10
Supplement: Supplementary file 11 [file supplementary › Supplementary Files FINAL/Figure S1.pdf]

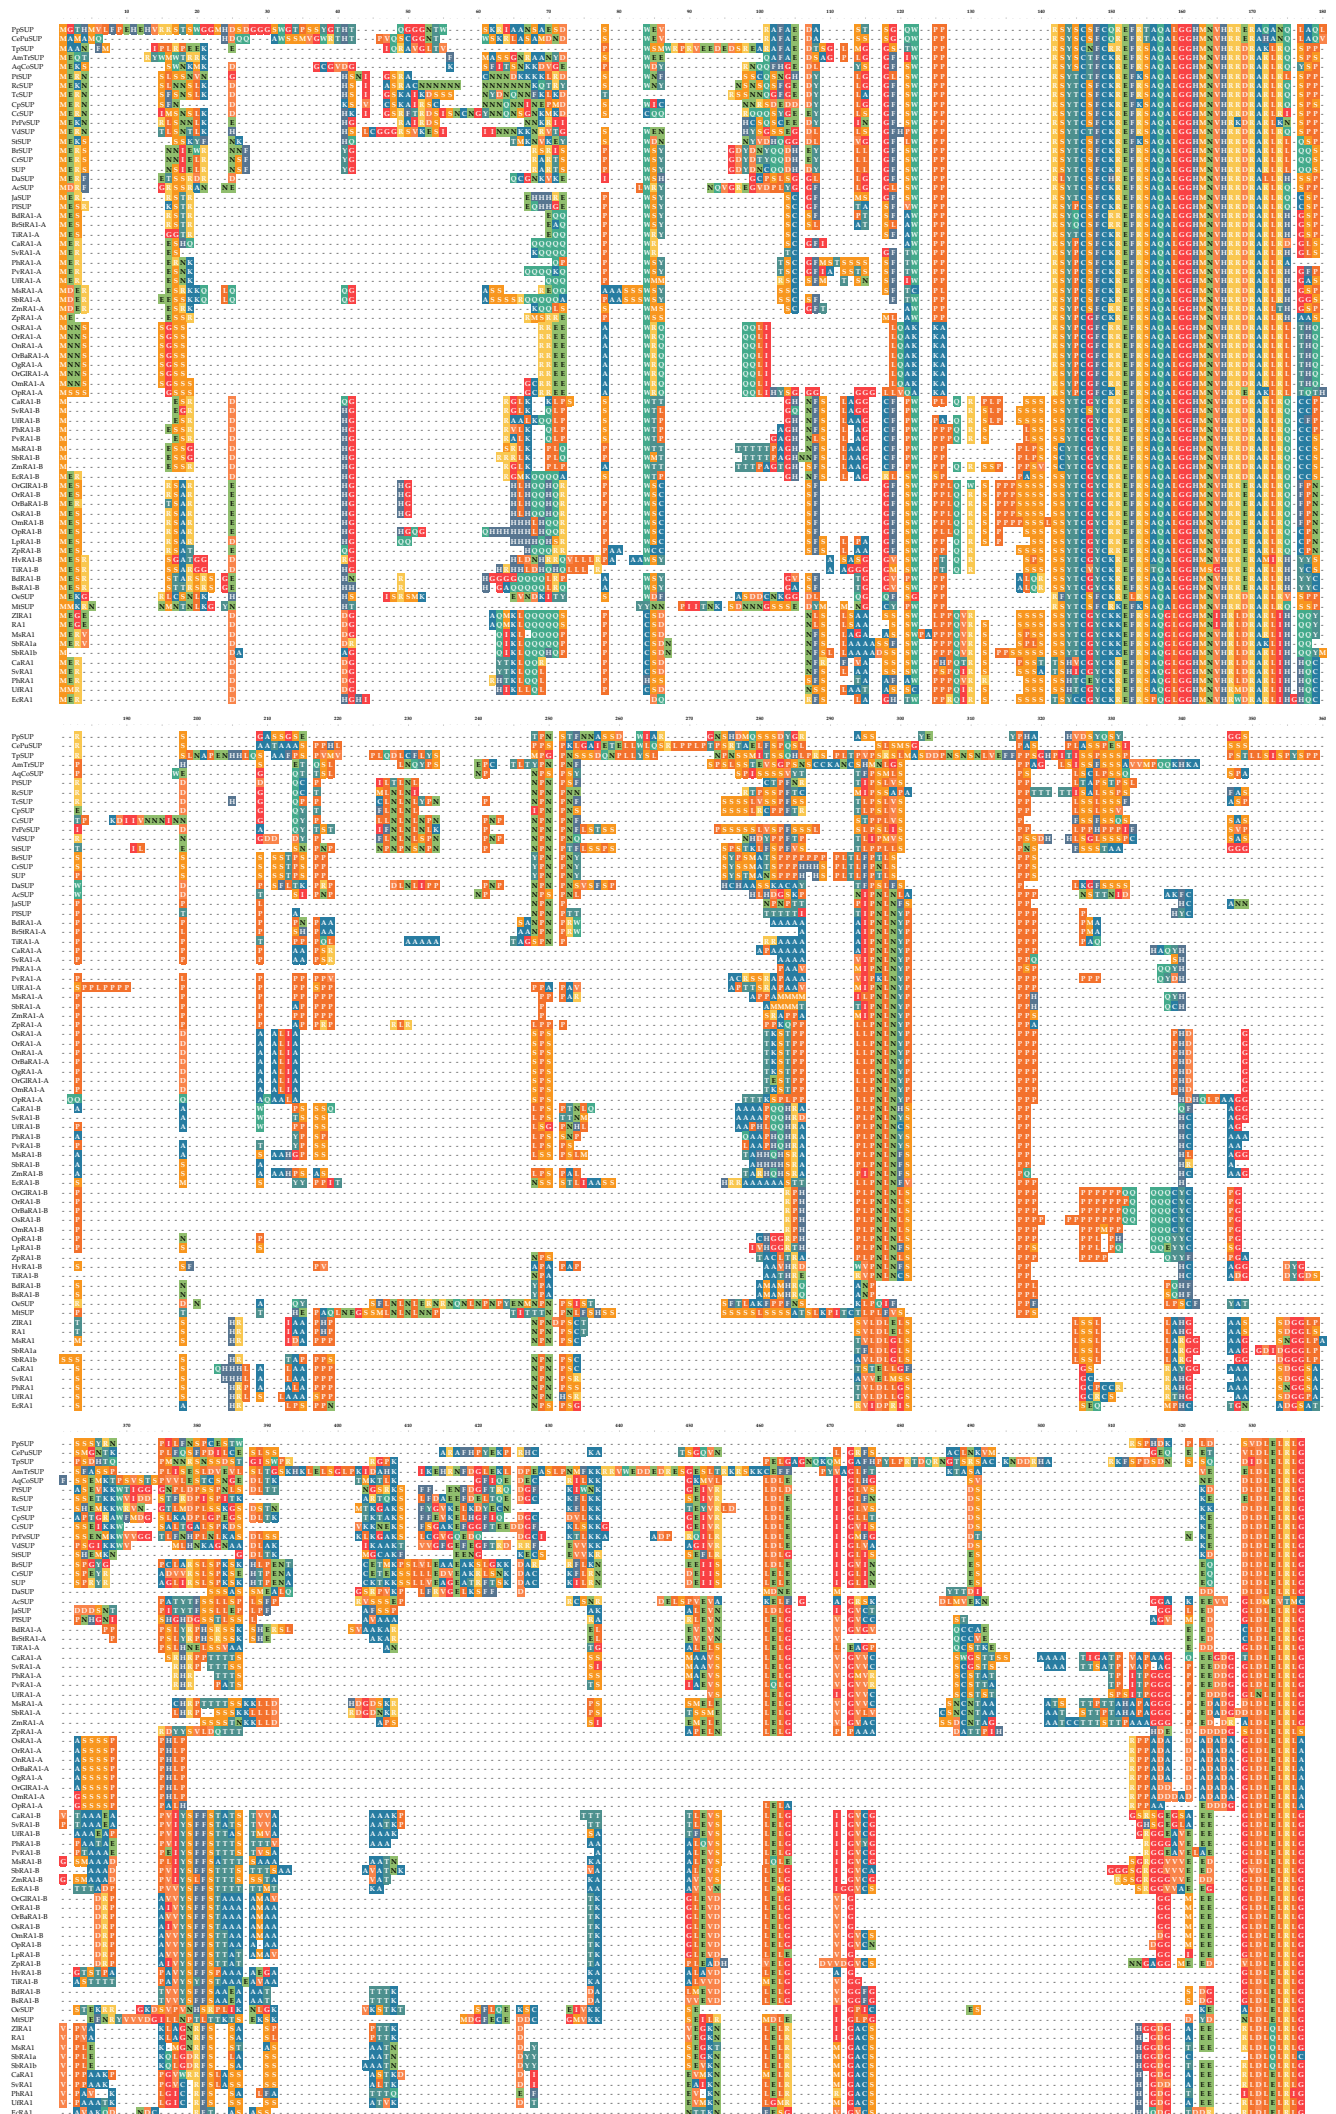

Figure S1. Multiple sequence alignment of 73 C2H2 zinc finger amino acid sequences from 48 embryophyte species.
