# Supplementary material for: Molecular Evolution of RAMOSA1 (RA1) in Land Plants
Source: Preprints.org preprint supplement (doi:10.20944/preprints202404.0730.v1), 2024-04-10
Supplement: Supplementary file 11 [file supplementary › Supplementary Files FINAL/Figure S9.pdf]

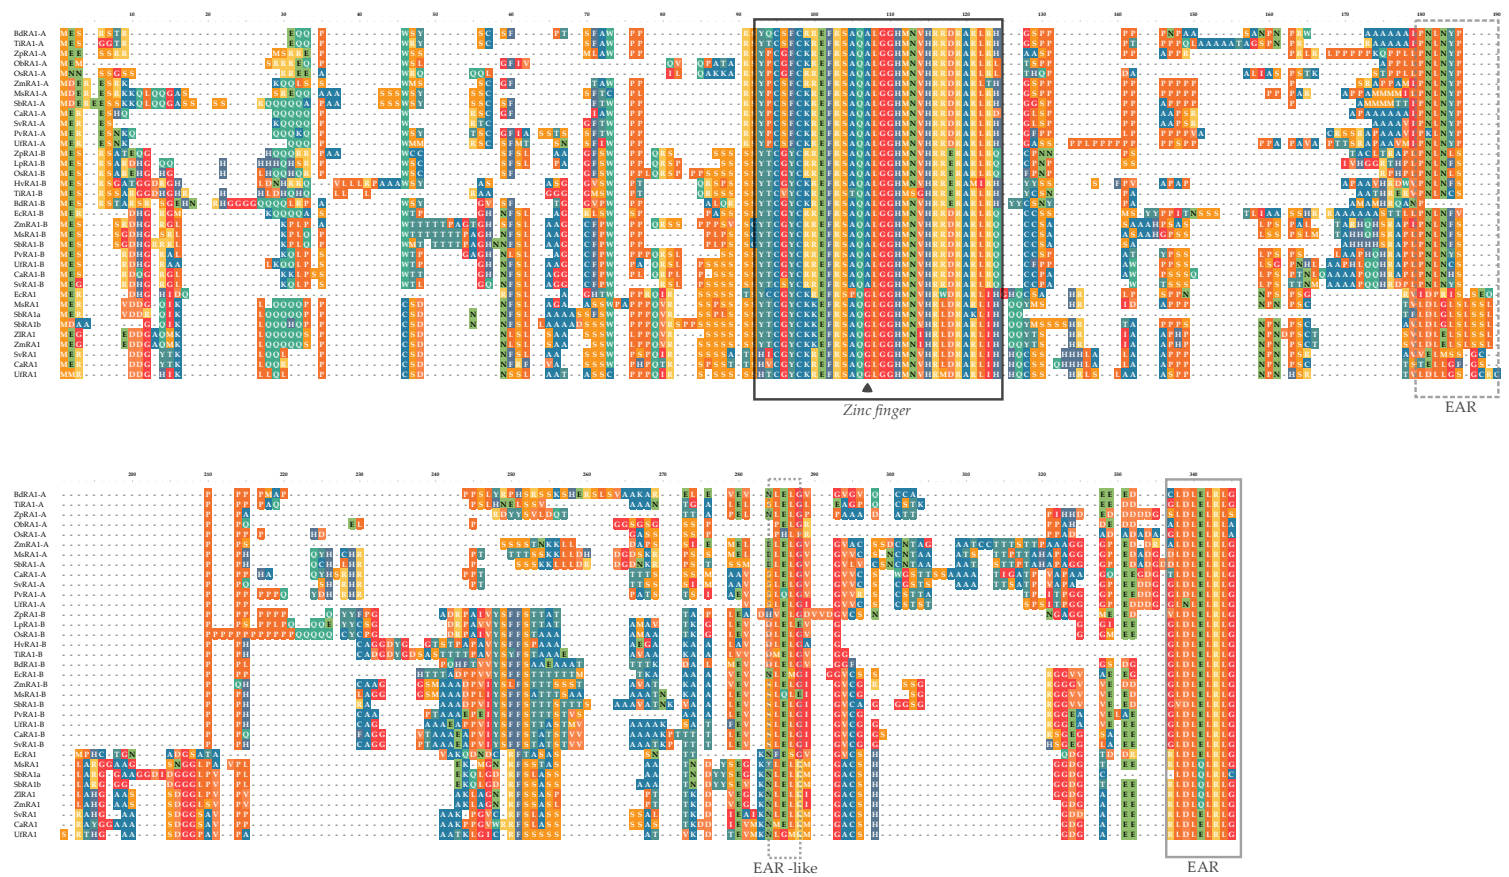

**Figure S9.** Multiple sequence alignment of 35 C2H2 zinc finger amino acid sequences from 16 grass species. Black box indicates the zinc finger domain (Motif 1). Grey boxes indicate the EAR motifs (Motif 2). Dashed grey box indicates the EAR motif conserved partially among these proteins. Dotted grey box indicates a motif composed by only two Leucine, similar to an EAR motif (EAR-like). Solid grey box indicates the EAR motif towards the C-terminal. Black arrowhead indicates the amino acid position changed (A -> G) in the zinc finger domain.
